# Supplementary material for: Transcriptomic Profiling of Muscle-Derived Stromal and Adipocytes Cells Exposed to Suborbital Microgravity
Source: Research Square preprint supplement (doi:10.21203/rs.3.rs-7745208/v1), 2025-12-10
Supplement: Supplementary file 1 [file 3c4e5e697ffeccf723a98ade.xlsx]

## Sheet: GO BIOLOGICAL PROCESS
GO upregulated
Term	PValue	Genes
GO:0030199~collagen fibril organization	1.09353e-08	COL1A1, COL18A1, COL3A1, TGFB2, COL1A2, COL5A1, COL14A1, COL5A3, COL12A1, COL5A2
GO:0110011~regulation of basement membrane organization	1.11458e-07	LAMA2, LAMB2, LAMB1, LAMC1, NID1
GO:0043588~skin development	2.16785e-06	DSP, COL1A1, COL3A1, WDR48, COL5A1, COL5A3, COL5A2
GO:2001046~positive regulation of integrin-mediated signaling pathway	3.51898e-06	LAMA2, LAMB2, LAMB1, LAMC1, NID1
GO:0051149~positive regulation of muscle cell differentiation	7.01212e-06	LAMA2, LAMB2, LAMB1, LAMC1, NID1
GO:0007155~cell adhesion	2.20841e-05	FBLN7, COL18A1, LAMA2, LAMB2, CLSTN1, COL12A1, TNC, FN1, LAMB1, PTPRK, LAMC1, PTPRF, COL1A1, CDH2, COL5A1, ITGA11, COL6A3, SVEP1
GO:0030198~extracellular matrix organization	2.54163e-05	COL1A1, COL18A1, COL3A1, COL1A2, COL4A2, COL4A1, COL14A1, COL5A3, COL5A2, OLFML2A
GO:0001501~skeletal system development	0.000241427	COL1A1, COL18A1, TGFB2, COL1A2, TRPS1, COL5A2, IGF1, FBN1
GO:0007179~transforming growth factor beta receptor signaling pathway	0.00040449	TGFBR3, COL3A1, TGFB2, COL1A2, USP9X, PTPRK, APPL1
GO:0016477~cell migration	0.00108507	TGFBR3, TGFB2, SLTM, CDH2, COL5A1, USP9X, PTPRK, LAMC1, PTPRF, EPHB3
GO:0007517~muscle organ development	0.00276836	LAMA2, ITGA11, MRTFB, COL6A3, IGF1, POU6F1
GO:0045785~positive regulation of cell adhesion	0.00291635	LAMA2, LAMB2, LAMB1, LAMC1, NID1
GO:0071230~cellular response to amino acid stimulus	0.00308828	COL1A1, COL3A1, COL1A2, COL4A1, COL5A2
GO:0007160~cell-matrix adhesion	0.00354193	COL3A1, COL5A3, ITGA11, FN1, SVEP1, NID1
GO:0007528~neuromuscular junction development	0.00361784	COL4A1, LAMB2, TNC, LAMC1
GO:0007507~heart development	0.00386842	COL3A1, TGFB2, PPP3CB, RBP4, FN1, PTPN11, POU6F1, FBN1
GO:0035987~endodermal cell differentiation	0.0039408	COL4A2, COL12A1, FN1, LAMB1
GO:0046326~positive regulation of D-glucose import	0.00501278	CLTCL1, PTPN11, IGF1, APPL1
GO:0042060~wound healing	0.00626487	DSP, COL3A1, TGFB2, FN1, IGF1
GO:0071526~semaphorin-plexin signaling pathway	0.00814469	NRP1, SLTM, SEMA6D, PLXNB2
GO:0003007~heart morphogenesis	0.00976962	TGFBR3, TGFB2, COL5A1, FAT4
GO:0034446~substrate adhesion-dependent cell spreading	0.0103501	FN1, LAMB1, LAMC1, EPHB3
GO:0006885~regulation of pH	0.0108823	SLC9A6, SLC9A9, PDK4
GO:0001837~epithelial to mesenchymal transition	0.0142488	TGFBR3, TGFB2, DLG5, IGF1
GO:0014911~positive regulation of smooth muscle cell migration	0.016396	NRP1, SEMA6D, IGF1
GO:0006376~mRNA splice site recognition	0.016396	LUC7L3, KHDC4, SRSF6
GO:0038063~collagen-activated tyrosine kinase receptor signaling pathway	0.0172502	COL1A1, COL4A2, COL4A1, EPHB3
GO:0035335~peptidyl-tyrosine dephosphorylation	0.0179255	PTPRS, PTPN11, PTPRF
GO:0018149~peptide cross-linking	0.0179255	DSP, COL3A1, FN1
GO:1903225~negative regulation of endodermal cell differentiation	0.0187026	COL5A1, COL5A2
GO:0072274~metanephric glomerular basement membrane development	0.0187026	LAMB2, LAMC1
GO:0010906~regulation of glucose metabolic process	0.0195128	NCOA2, PDK4, ACACB
GO:0071711~basement membrane organization	0.0195128	COL3A1, COL4A1, NID1
GO:0030517~negative regulation of axon extension	0.0195128	PTPRS, SEMA6D, DIP2B
GO:0007229~integrin-mediated signaling pathway	0.0213658	NRP1, COL3A1, ITGA11, FN1, PTPN11
GO:0042593~glucose homeostasis	0.0246096	CEBPA, RBP4, PDK4, PTPN11, FBN1
GO:0008286~insulin receptor signaling pathway	0.0252921	SREBF1, PDK4, IGF1, EPHB3, APPL1
GO:0072249~metanephric podocyte development	0.0279231	LAMB2, LAMC1
GO:0048677~axon extension involved in regeneration	0.0279231	LAMB2, LAMC1
GO:0050679~positive regulation of epithelial cell proliferation	0.028216	WDR48, LAMB1, IGF1, LAMC1
GO:0006338~chromatin remodeling	0.0289082	KDM5A, KDM5B, SMG1, PTPRS, PTPN11, PTPRK, PTPN23, PTPRF, HIPK3, PIKFYVE, PPP3CB, RIPK1, TAF1
GO:0009611~response to wounding	0.0303299	NRP1, TGFB2, TNC, FN1
GO:0042476~odontogenesis	0.0321468	TGFB2, COL1A2, LAMB1
GO:0006325~chromatin organization	0.033118	KDM5A, MEG3, MMS22L, KDM5B, UBN2, ZNF518B, NEAT1
GO:0007411~axon guidance	0.0331627	NRP1, LAMA2, LAMB2, SEMA6D, LAMC1, EPHB3
GO:0050731~positive regulation of peptidyl-tyrosine phosphorylation	0.0359692	NRP1, LRP4, PTPN11, IGF1
GO:0035583~sequestering of TGFbeta in extracellular matrix	0.0370574	LTBP1, FBN1
GO:0048592~eye morphogenesis	0.0370574	COL5A1, COL5A2
GO:0006897~endocytosis	0.0380923	MRC2, LRP4, ANKFY1, MARCHF3, EHBP1, ATP9A
GO:0098609~cell-cell adhesion	0.0380923	DSP, CDH2, COL14A1, DLG5, ITGA11, FAT4
GO:0044344~cellular response to fibroblast growth factor stimulus	0.0383145	COL1A1, NR4A1, KDM5B
GO:0021987~cerebral cortex development	0.0421088	COL3A1, PTPRS, CDH2, FAT4
GO:0030324~lung development	0.0447026	SREBF1, CEBPA, COL3A1, RBP4
GO:0048675~axon extension	0.0448921	PPP3CB, SLC9A6, USP9X
GO:0032570~response to progesterone	0.0448921	SREBF1, NCOA2, TGFB2
GO:0031297~replication fork processing	0.0494912	ETAA1, MMS22L, PRIMPOL
GO:2001237~negative regulation of extrinsic apoptotic signaling pathway	0.0494912	NRP1, RIPK1, IGF1
GO:0048706~embryonic skeletal system development	0.0494912	COL1A1, RBP4, SULF1
Downregulated GO
Term	p-Value	Symbols
GO:0045765~regulation of angiogenesis	0.0053991	SFRP1, GPNMB, VASH2, HMOX1
GO:0050930~induction of positive chemotaxis	0.00647256	CXCL12, VEGFB, VEGFD
GO:0030261~chromosome condensation	0.0156351	H1-4, NCAPH2, H1-2
GO:0060048~cardiac muscle contraction	0.0253547	TNNI1, VEGFB, ATP1A2
GO:0030240~skeletal muscle thin filament assembly	0.041116	ACTA1, ACTC1
Supp. Table 2. List of significantly upregulated (top) and downregulated (bottom) biological processes in the models of skeletal muscle stroma and rakend by p-Value. The group of intramuscular adipose tissue models kept at ground were used as reference.
Selected biological processes are highlighted in bold.

## Sheet: KEGG PATHWAYS
Upregulated KEGG PATHWAYS
Term	p-Value	Symbols
hsa04820:Cytoskeleton in muscle cells	1.22963e-10	DSP, LAMA2, MYH15, ELN, FN1, NID1, COL1A1, COL3A1, COL1A2, COL4A2, COL5A1, DAAM1, COL4A1, COL5A3, COL5A2, ITGA11, COL6A3, FBN1
hsa04974:Protein digestion and absorption	5.23353e-10	COL18A1, COL14A1, ELN, COL12A1, COL1A1, COL3A1, COL1A2, COL4A2, COL5A1, COL4A1, COL5A3, COL5A2, COL6A3
hsa04512:ECM-receptor interaction	1.23734e-09	COL1A1, COL1A2, COL4A2, LAMA2, COL4A1, LAMB2, ITGA11, TNC, FN1, COL6A3, LAMB1, LAMC1
hsa05146:Amoebiasis	6.02145e-09	COL1A1, COL3A1, TGFB2, PLCB4, COL1A2, COL4A2, LAMA2, COL4A1, LAMB2, FN1, LAMB1, LAMC1
hsa04510:Focal adhesion	8.79338e-07	LAMA2, LAMB2, TNC, FN1, LAMB1, LAMC1, IGF1, COL1A1, COL1A2, COL4A2, COL4A1, ITGA11, COL6A3
hsa04151:PI3K-Akt signaling pathway	1.53028e-05	LAMA2, LAMB2, TNC, FN1, LAMB1, LAMC1, IGF1, COL1A1, NR4A1, GNG2, COL1A2, COL4A2, COL4A1, ITGA11, COL6A3
hsa05222:Small cell lung cancer	4.18008e-05	COL4A2, LAMA2, COL4A1, LAMB2, FN1, LAMB1, POLK, LAMC1
hsa04933:AGE-RAGE signaling pathway in diabetic complications	7.10636e-05	COL1A1, COL3A1, TGFB2, PLCB4, COL1A2, COL4A2, COL4A1, FN1
hsa05165:Human papillomavirus infection	0.000532547	COL1A1, COL1A2, COL4A2, LAMA2, COL4A1, LAMB2, ITGA11, TNC, FN1, COL6A3, LAMB1, LAMC1
hsa04926:Relaxin signaling pathway	0.00205108	COL1A1, COL3A1, PLCB4, GNG2, COL1A2, COL4A2, COL4A1
hsa05200:Pathways in cancer	0.0027304	CEBPA, TGFB2, LAMA2, LAMB2, FN1, LAMB1, LAMC1, IGF1, PLCB4, GNG2, COL4A2, COL4A1, POLK, APPL1
hsa04360:Axon guidance	0.0110505	NRP1, PPP3CB, TRPC1, SEMA6D, PLXNB2, PTPN11, EPHB3
hsa05145:Toxoplasmosis	0.0272292	TGFB2, LAMA2, LAMB2, LAMB1, LAMC1
Downregulated KEGG PATHWAYS
Term	p-Value	Symbols
hsa04814:Motor proteins	0.0482022	ACTA1, DNAI3, ACTC1, TNNI1, DYNLRB1
Supp. Table 2. List of significantly upregulated (top) and downregulated (bottom) KEGG pathways in the models of skeletal muscle stroma and rakend by p-Value. The group of intramuscular adipose tissue models kept at ground were used as reference.
Selected biological processes are highlighted in bold.

## Sheet: WIKI PATHWAYS
Upregulated WIKI PATHWAYS
Term	p-Value	Symbols
WP2911:miRNA targets in ECM and membrane receptors	9.16266e-14	COL3A1, COL1A2, COL4A2, COL5A1, COL4A1, LAMB2, COL5A3, ITGA11, COL5A2, FN1, COL6A3, LAMC1
WP3932:Focal adhesion PI3K Akt mTOR signaling	1.31573e-08	SREBF1, LAMA2, LAMB2, TNC, FN1, LAMB1, LAMC1, IGF1, COL1A1, COL3A1, GNG2, COL1A2, COL4A2, COL5A1, COL4A1, COL5A3, COL5A2, ITGA11
WP306:Focal adhesion	1.39134e-07	LAMA2, LAMB2, TNC, FN1, LAMB1, LAMC1, IGF1, COL1A1, COL1A2, COL4A2, COL4A1, COL5A3, COL5A2, ITGA11
WP453:Inflammatory response pathway	5.61146e-07	COL1A1, COL3A1, COL1A2, LAMB2, FN1, LAMB1, LAMC1
WP4172:PI3K Akt signaling	5.03648e-05	LAMA2, LAMB2, TNC, FN1, LAMB1, LAMC1, IGF1, COL1A1, GNG2, COL1A2, COL4A2, COL4A1, ITGA11, COL6A3
WP4658:Small cell lung cancer	6.35996e-05	COL4A2, LAMA2, COL4A1, LAMB2, FN1, LAMB1, POLK, LAMC1
WP244:Alpha 6 beta 4 signaling	0.000373181	LAMA2, LAMB2, PTPN11, LAMB1, LAMC1
WP3967:miR 509 3p alteration of YAP1 ECM axis	0.000822484	COL1A1, COL3A1, COL5A1, FN1
WP5055:Burn wound healing	0.00112177	COL1A1, TGFB2, COL1A2, ELN, TNC, FBN1
WP5144:NRP1 triggered signaling in pancreatic cancer	0.00227488	TGFBR3, COL1A1, NRP1, TGFB2, COL1A2
WP5434:Cancer pathways	0.00247676	CEBPA, TGFB2, LAMA2, LAMB2, FN1, LAMB1, LAMC1, IGF1, PLCB4, GNG2, COL4A2, COL4A1, POLK, APPL1
WP4148:Splicing factor NOVA regulated synaptic proteins	0.00964536	PLCB4, CDH2, CLSTN1, STX2
WP3859:TGF beta signaling in thyroid cells for epithelial mesenchymal transition	0.013461	CDH2, TNC, FN1
WP2380:Brain derived neurotrophic factor BDNF signaling	0.0146038	MAP3K1, CDH2, KIDINS220, PTPN11, ACACB, PTPRF
WP5087:Pleural mesothelioma	0.0167513	PLCB4, MAP3K1, COL4A2, LAMA2, CDH2, COL4A1, LAMB2, FN1, LAMB1, IGF1, LAMC1
WP4816:TGF beta receptor signaling in skeletal dysplasias	0.0240391	TGFBR3, ZNF423, LTBP1, FBN1
WP4239:Epithelial to mesenchymal transition in colorectal cancer	0.0278763	DSP, TGFB2, COL4A2, CDH2, COL4A1, FN1
WP3668:Hypothesized pathways in pathogenesis of cardiovascular disease	0.0281228	TGFBR3, LTBP1, FBN1
WP2005:miR targeted genes in muscle cell	0.032136	COL1A1, MRC2, NRP1, COL3A1, COL1A2, ANKFY1, LAMC1, PTPRF, HIPK3
WP5036:Angiotensin II receptor type 1 pathway	0.0347232	COL1A1, COL1A2, PTPN11
WP5158:Urotensin II mediated signaling	0.0359574	COL1A1, COL3A1, FN1, PTPN11
WP2118:Arrhythmogenic right ventricular cardiomyopathy	0.0443207	DSP, LAMA2, CDH2, ITGA11
WP4149:White fat cell differentiation	0.0443504	SREBF1, CEBPA, ZNF423
WP2882:Nuclear receptors meta pathway	0.0472388	TGFBR3, SREBF1, NCOA2, TGFB2, MYOF, PDK4, POLK, SLC5A3
Downregulated WIKI PATHWAYS
Term	p-Value	Symbols
WP5078:T cell modulation in pancreatic cancer	0.00435944	CXCL12, VEGFB, VEGFD, HAVCR2
WP5285:Immune infiltration in pancreatic cancer	0.0257747	CXCL12, VEGFB, VEGFD
WP5087:Pleural mesothelioma	0.0406423	ACTA1, SFRP1, JUN, CXCL12, ACTC1, DDIT3, AKT1S1, VEGFB, VEGFD
WP236:Adipogenesis	0.0424309	CFD, SOCS1, RBL1, DDIT3, LPIN1
WP2533:Glycerophospholipid biosynthetic pathway	0.0440567	PTDSS1, GPD1, LPIN1
Supp. Table 2. List of significantly upregulated (top) and downregulated (bottom) WIKI pathways in the models of skeletal muscle stroma and rakend by p-Value. The group of intramuscular adipose tissue models kept at ground were used as reference.
Selected biological processes are highlighted in bold.
