# Supplementary material for: Transcriptomic Profiling of Muscle-Derived Stromal and Adipocytes Cells Exposed to Suborbital Microgravity
Source: Research Square preprint supplement (doi:10.21203/rs.3.rs-7745208/v1), 2025-12-10
Supplement: Supplementary file 2 [file 6889e4189014aa3c69c59675.xlsx]

## Sheet: GO BIOLOGICAL PROCESS
Upregulated GO
Term	p-Value	Symbols
GO:0002181~cytoplasmic translation	1.69143e-51	RPL30, RPL32, RPL34, RPLP1, RPLP0, RPL10A, RPL8, RPL9, RPS15, RPS14, RPS17, RPS16, RPS19, RPL18A, RPS18, RPL36, RPLP2, RPL35, RPL38, RPL37, RPS11, RPL39, RPS10, RPS13, RPS12, RPS9, RPL21, RPS7, RPS5, RPL13A, RPL37A, RPL24, RPL27, RPL29, RPL28, UBA52, RPL10, RPL12, RPS3, RPL13, RPS2, RPL18, RPL19, RPL41, RPL35A, RPL23A, RPS26, RPS25, RPS28, RPS27, RPS29, RPL27A, RPS20, FAU, RPS21
GO:0006412~translation	5.3715e-47	RPL30, RPL32, RPL34, RPLP1, MRPS11, RPLP0, MRPS12, MRPL36, RPL10A, RPL8, RPL9, MRPL4, RPS15, MRPL41, RPS14, RPS17, MRPL2, RPS16, RPS19, RPL18A, RPS18, RPL36, RPLP2, RPL35, RPL38, RPL37, RPS11, RPL39, RPS10, RPS13, RPS12, RPS9, RPL21, RPS7, RPS5, MRPS18B, MRPS2, MRPS21, RPL13A, MRPL52, RPL37A, RPL24, RPL27, RPL29, RPL28, UBA52, RPL10, RPL12, MRPL17, MRPL12, MRPL55, MRPL11, MRPL20, PDF, RPS3, RPL13…
GO:0042776~proton motive force-driven mitochondrial ATP synthesis	3.43651e-15	NDUFA13, STOML2, NDUFB7, ATP5PD, NDUFA6, NDUFA11, NDUFB11, NDUFA3, NDUFA2, NDUFB2, NDUFA1, NDUFB1, SDHC, ATP5F1D, ATP5F1E, NDUFS8, NDUFS7, NDUFS6, NDUFS5, NDUFS3, NDUFV1, ATP5MF, ATP5ME
GO:1902600~proton transmembrane transport	7.5933e-13	NDUFB7, COX4I1, ATP5MC2, NDUFB2, ATP5MC3, NDUFB1, COX5B, COX7A1, UQCRH, ATP5MC1, CYC1, ATP6V0E2, NDUFV1, ATP5MF, ATP5ME, ATP6V1F, COX8A, CYB5A, ATP6V0B, NDUFA6, ATP5PD, NDUFA4, NDUFA3, NDUFA2, NDUFA1, ATP5F1D, ATP5F1E, COX6B1, NDUFS8, NDUFS6, NDUFS5, NDUFS3, ATP6V0D1
GO:0032543~mitochondrial translation	1.50042e-11	GADD45GIP1, MRPS11, MRPS12, MRPS34, MRPL27, MRPS18B, MRPL17, MRPS2, MRPS21, MRPL14, MRPL36, MRPL23, MRPL12, MRPL24, MRPL57, MRPL54, MRPL11, MRPL55, MRPL4, MRPL41, MRPL52, MRPL20, MRPL2
GO:0009060~aerobic respiration	1.695e-11	NDUFA13, NDUFB7, NDUFA6, NDUFA11, NDUFB11, NDUFA3, NDUFA2, NDUFB2, NDUFA1, NDUFB1, SDHC, ATP5F1D, UQCRH, NDUFS8, NDUFS7, NDUFS6, BLOC1S1, NDUFS5, NDUFS3, NDUFV1
GO:0042274~ribosomal small subunit biogenesis	1.74913e-10	RPS9, RPS7, RPS19BP1, DIMT1, RPS5, SNU13, IMP4, RRP9, RPS15, RPS14, RPS25, RPS17, TBL3, RPS28, RPS16, RPS27, RPS19, RPS11, RPS13, RPS12
GO:0006120~mitochondrial electron transport, NADH to ubiquinone	2.29107e-10	NDUFB7, NDUFA6, NDUFA11, NDUFA4, NDUFA3, NDUFA2, NDUFB2, NDUFA1, NDUFB1, COQ9, NDUFS8, NDUFS7, NDUFS6, NDUFS5, NDUFS3, NDUFV1
GO:0032981~mitochondrial respiratory chain complex I assembly	1.32007e-09	NDUFA13, NDUFB7, NDUFA6, DMAC1, NDUFA11, NDUFB11, NDUFA3, NDUFA2, NDUFB2, NDUFA1, NDUFB1, BCS1L, NDUFAF8, NDUFS8, NDUFS7, NDUFS5, NDUFAF2, NDUFS3
GO:0045333~cellular respiration	4.02686e-09	COX8A, NDUFA4, COX4I1, COX7A2, UQCR11, COX5B, COX6A1, MTLN, COX7C, UQCRH, COX6B1, CHCHD5, UQCRQ, CYC1
GO:0006626~protein targeting to mitochondrion	7.36391e-09	TIMM8B, FIS1, TOMM40, TIMM13, AIP, TOMM7, TSPO, PIN1, TIMM17B, TIMM10, BID, TOMM5
GO:0006364~rRNA processing	4.22916e-08	POP7, RPS7, CDKN2A, RRP1, RPL35A, NOC4L, IMP4, RRP9, RPS15, EXOSC7, RPS25, RPS17, TBL3, RPS28, RPS16, RPS27, RPS19, PES1, RPL27, PIN4, NOP53, NOP10, RPP38
GO:0015986~proton motive force-driven ATP synthesis	4.41819e-07	ATP5PD, ATP5MC2, ATP5MK, ATP5MC3, ATP5MJ, ATP5F1D, ATP5F1E, ATP5MF, ATP5MC1, ATP5ME
GO:0006123~mitochondrial electron transport, cytochrome c to oxygen	2.72802e-06	COX8A, NDUFA4, COX4I1, COX7A2, COX5B, COX6A1, COX7A1, COX7C, COX6B1
GO:0000028~ribosomal small subunit assembly	2.34515e-05	RPS15, RPS14, RPS28, RPS27, RPS19, RPS5, FAU
GO:0033617~mitochondrial cytochrome c oxidase assembly	0.000149519	COA4, COA3, TMEM223, PET100, SCO2, COX14, UQCC5, BCS1L
GO:0030490~maturation of SSU-rRNA	0.000177669	RPS14, TRMT112, RPS28, RPS19, TSR3, IMP4, SNU13
GO:0030150~protein import into mitochondrial matrix	0.0012324	TOMM40, GRPEL1, TOMM7, TIMM17B, ROMO1, TIMM50
GO:0045039~protein insertion into mitochondrial inner membrane	0.00138532	TIMM8B, NDUFA13, TIMM13, ROMO1, TIMM10
GO:0042254~ribosome biogenesis	0.0017273	RPS28, PES1, GRWD1, RPLP0, SNU13, NOC4L, NOP53, RCC1L
GO:0051604~protein maturation	0.00176683	CHCHD4, CFD, ISCA2, CCS, BOLA3, SERPINH1, AIP, STUB1, CIAO2B, UBAC1, LMF2, CISD3
GO:0034614~cellular response to reactive oxygen species	0.00225095	PRDX5, MMP3, RPS3, ROMO1, PEX10, FOS, PARK7, MPV17
GO:0006091~generation of precursor metabolites and energy	0.00225095	COX8A, ATP5IF1, COX4I1, FDXR, UQCR11, COX6A1, COX7A1, COX7C
GO:0006886~intracellular protein transport	0.00433542	AP5Z1, UNC93B1, ASPSCR1, CLTB, TIMM50, STX10, RAB32, ARL4D, GRPEL1, CLTCL1, ERP29, AP2S1, TIMM17B, IFT27, ROMO1, SEC61B, SIL1, RAMP1, STX1A, ARF5, AP1M1, VPS16
GO:0006414~translational elongation	0.00505165	EIF5A, EEF1B2, EEF1D, RPLP1, TUFM
GO:0006979~response to oxidative stress	0.00548561	NQO1, NDUFA6, GPX1, GPX4, NUDT1, PARK7, COMT, ATOX1, TXN2, PRDX5, PSMB5, NAPRT, APOE
GO:0000398~mRNA splicing, via spliceosome	0.00610431	SF3B5, RBM14, PPIL1, SNU13, XAB2, UBL5, LSM7, DDX39A, SNRPD2, CWF19L1, NHP2, SNRPG, RBM42, RALY, PRPF31, SNRPC, SNRPB
GO:0009117~nucleotide metabolic process	0.006198	NT5C3B, NUDT16, DNPH1, ADA, ITPA
GO:1901798~positive regulation of signal transduction by p53 class mediator	0.00838197	RPS15, CDKN2A, RPS20, RPL37
GO:0006228~UTP biosynthetic process	0.00838197	NME2, NME3, NME4, NME1
GO:0098869~cellular oxidant detoxification	0.0103421	GSTZ1, PRDX5, GPX1, GPX4, GSTP1, SELENOW, APOE, TXNDC17, PTGES
GO:0006241~CTP biosynthetic process	0.0108458	NME2, NME3, NME4, NME1
GO:0006183~GTP biosynthetic process	0.0108458	NME2, NME3, NME4, NME1
GO:0006487~protein N-linked glycosylation	0.0129566	OST4, TMEM258, PMM1, GORASP1, DOLPP1, RFT1, MGAT1, DDOST
GO:0002474~antigen processing and presentation of peptide antigen via MHC class I	0.013684	HLA-B, HLA-C, HLA-A, HLA-E
GO:0006783~heme biosynthetic process	0.014499	ATP5IF1, ALAS1, UROD, HMBS, TSPO
GO:0010867~positive regulation of triglyceride biosynthetic process	0.0169037	NR1H2, NR1H3, LDLR, MFSD2A
GO:0006122~mitochondrial electron transport, ubiquinol to cytochrome c	0.0169037	UQCRQ, UQCR11, CYC1, UQCRH
GO:0031334~positive regulation of protein-containing complex assembly	0.0175012	LGALS3, MMP3, RPS3, PARK7, RHOC, BID, MTLN
GO:0002082~regulation of oxidative phosphorylation	0.0205096	SHMT2, UQCC2, COX7A2, COX7A1
GO:0042270~protection from natural killer cell mediated cytotoxicity	0.0217352	HLA-B, HLA-A, HLA-E
GO:0031401~positive regulation of protein modification process	0.0217352	ASPSCR1, NUPR1, NELFA
GO:0034599~cellular response to oxidative stress	0.0228773	CHCHD4, NQO1, PRDX5, CCS, CHCHD2, TMEM161A, ENDOG, GPX1, PYCR1, PARK7
GO:0048144~fibroblast proliferation	0.0234799	GPX1, DPH1, CKS2, NUPR1, LZTS2, HRAS
GO:0071456~cellular response to hypoxia	0.0270594	TBL2, ENDOG, RGCC, IRAK1, CITED2, BAD, MLST8, PIN1, STUB1, FOS, PHB2, NOP53
GO:0019430~removal of superoxide radicals	0.028885	NQO1, CCS, PARK7, SOD3
GO:0002486~antigen processing and presentation of endogenous peptide antigen via MHC class I via ER pathway, TAP-independent	0.028885	HLA-B, HLA-C, HLA-A, HLA-E
GO:0002476~antigen processing and presentation of endogenous peptide antigen via MHC class Ib	0.028885	HLA-B, HLA-C, HLA-A, HLA-E
GO:0010950~positive regulation of endopeptidase activity	0.0296269	PSENEN, PRELID1, VSIR
GO:0090027~negative regulation of monocyte chemotaxis	0.0296269	DUSP1, MICOS10-NBL1, NBL1
GO:0090671~telomerase RNA localization to Cajal body	0.0296269	RUVBL2, NHP2, NOP10
GO:0000387~spliceosomal snRNP assembly	0.0309633	TSSC4, SNRPD2, SNRPG, SNRPC, SNRPB
GO:0019882~antigen processing and presentation	0.033617	RAB32, HLA-B, HLA-C, HLA-A, RELB, HLA-DPA1
GO:0071816~tail-anchored membrane protein insertion into ER membrane	0.0336516	EMC3, EMC4, GET3, EMC9
GO:0006915~apoptotic process	0.0378051	IFI27L2, TRADD, CIB1, YARS1, ING4, MRPL41, MYDGF, MIEN1, LGALS1, PUF60, BCL7C, RPS3, EMC4, APBB1, PHLDA2, BID, FIS1, RBM14, PRELID1, SIVA1, GPX4, CDKN2A, BAD, NEK6, TAF10, NME3, EMP3, ZDHHC16, MFSD10, THOC6, PACS2, TMEM214, PTRH2, TMEM219, LTBR, GAPDH, SQSTM1
GO:0036261~7-methylguanosine cap hypermethylation	0.0384647	SNRPD2, SNRPG, SNRPB
GO:0070995~NADPH oxidation	0.0384647	NQO1, PRDX5, FDXR
GO:0006785~heme B biosynthetic process	0.0384647	ALAS1, UROD, HMBS
GO:1903214~regulation of protein targeting to mitochondrion	0.0384647	ATP5IF1, HAX1, CDKN2A
GO:0016226~iron-sulfur cluster assembly	0.0421001	ISCA2, BOLA3, CIAO2B, CIAO3, NUBP2
GO:0007005~mitochondrion organization	0.0422489	RAB32, FIS1, CHCHD2, STOML2, TMEM11, PARK7, SLIRP, BCS1L, PHB2, HSD17B10
GO:0007265~Ras protein signal transduction	0.044195	DOK1, MRAS, CSF1, RRAS, CDKN2A, RFXANK, PARK7, HRAS
GO:0070131~positive regulation of mitochondrial translation	0.0443217	TRUB2, COA3, UQCC2, RCC1L
GO:0010918~positive regulation of mitochondrial membrane potential	0.0481598	BAD, BID, MTLN
GO:0110076~negative regulation of ferroptosis	0.0481598	NQO1, GPX4, SQSTM1
GO:0010883~regulation of lipid storage	0.0481598	NR1H2, NR1H3, ALKBH7
GO:0048034~heme O biosynthetic process	0.0481598	ALAS1, UROD, HMBS
Downregulated GO
Term	p-Value	Symbols
GO:0030155~regulation of cell adhesion	0.000650953	PPP1R12A, LAMA2, ROCK2, TNC, ABL2, LMO7, CBLL1, PTK2, JAK1
GO:0007155~cell adhesion	0.000688596	PTPRU, SPON1, LAMA2, COL12A1, TNC, PTPRK, THBS2, PNN, ALCAM, PODXL, CYP1B1, ABL2, SVEP1, CD164, DST, NEGR1, PCDH9, ERBIN, MTSS1, CLDN5, FER, ADAM17, VCAN, ITGA10, COL6A3, ITGA6, CD47, TLN2, SSX2IP, ITGA9, DDR2
GO:0006911~phagocytosis, engulfment	0.00199275	ABCA1, MYH9, DOCK1, ARHGAP12, GULP1
GO:0016567~protein ubiquitination	0.00256214	RNF34, UBA6, CUL1, UBR4, UBR3, CCAR1, VCPIP1, CAND1, HECTD1, BTBD1, HERC1, ENC1, FEM1C, RBBP6, ARIH1, DCAF10, SOCS6, MARCHF6, USP9Y, FBXL17, KLHL2, LMO7, FBXO33, PJA2, FBXO30, MIB1, KCTD9, APPBP2, KLHL7, KLHL8, TTC3, MDM2, BIRC6, TRIP12, CBLL1, DZIP3, TRIM33
GO:0006470~protein dephosphorylation	0.00298441	PPP3CA, PTPRU, PPP1CC, PPM1B, PPP3CB, PPP1R12A, PTEN, PTPRK, MTMR6, MTM1, CDC14B
GO:0007173~epidermal growth factor receptor signaling pathway	0.00393104	PDGFRA, ADAM17, KIF16B, ERBIN, ABL2, TEK, IQGAP1, MET, PTK2, EREG, DDR2
GO:0070102~interleukin-6-mediated signaling pathway	0.00467901	YAP1, FER, SMAD4, IL6ST, JAK1
GO:0051056~regulation of small GTPase mediated signal transduction	0.00498487	GNA13, NET1, ARHGAP21, AKAP13, ARHGAP20, TRIO, RALGAPB, DLC1, ITSN1, ARHGAP29, MYO9A, ARHGAP24
GO:0006338~chromatin remodeling	0.00762526	RB1, PTPRU, PRKAA1, TRIO, ROCK2, PTEN, DDX21, PTPRK, RPAP2, AURKA, PTPRG, TTN, CDC14B, PPP3CA, RPS6KA3, PPP1CC, PPP3CB, SLK, AKT3, CHEK1, SMARCAD1, ARID2, MAP3K7, MARK3, BPTF, CSNK1G3, KDM2B, RIOK3, NCOA3, ATRX, HUWE1, EIF2AK2, OXSR1, ASH1L, SMARCA1, HIPK3, MTOR, UHMK1, PPM1B, UBLCP1, WNK1, STK17A, ERCC6, PRMT9, KDM7A, ATR
GO:0030336~negative regulation of cell migration	0.00857644	PTPRU, IGFBP5, PTEN, ARID4B, PTPRK, ALOX15B, TGFBR1, RAP2C, CLDN5, DLC1, TP53INP1, NF1, CYP1B1, ARID2, OGT
GO:0009611~response to wounding	0.012627	IL33, EDNRA, DST, NFIB, TNC, SLC1A3, NR3C1, AURKA
GO:0030902~hindbrain development	0.0190671	AHI1, KDM2B, NFIB, CEP290
GO:0007051~spindle organization	0.0190671	SUGT1, KIZ, CKAP5, AURKA
GO:0006376~mRNA splice site recognition	0.0196872	SRSF1, LUC7L3, SRSF10, PTBP2, LUC7L2
GO:0030325~adrenal gland development	0.0196872	PDGFRA, SMAD4, NF1, CYP1B1, NR3C1
GO:0045860~positive regulation of protein kinase activity	0.0202865	MMD, PRKAG2, IQGAP1, PTK2, EREG, DDR2
GO:0001975~response to amphetamine	0.0243992	RANBP2, PPP3CA, RGS17, EDNRA, HDAC9
GO:0008286~insulin receptor signaling pathway	0.0245403	PDGFRA, FER, CAV2, PIK3R3, ZNF106, TEK, AP3S1, IDE, MET, SOS2, DDR2
GO:0043161~proteasome-mediated ubiquitin-dependent protein catabolic process	0.0246157	USP14, PSMD12, RNF34, WDR26, CUL1, RHOBTB3, UBR4, UBE3A, AURKA, MTM1, HECTD1, TRIM2, FEM1C, MARCHF6, FBXL17, HUWE1, KLHL2, UBE2G1, PJA2, APPBP2, KLHL7, KLHL8, MDM2, ERCC8, TRIP12
GO:0046907~intracellular transport	0.0248698	RANBP2, AP3M1, RAB14, APPBP2, NUP50, HPS3, AP3S1
GO:0080135~regulation of cellular response to stress	0.0258911	TRRAP, SLC38A2, MTOR, ATR
GO:0007517~muscle organ development	0.0275089	MEF2A, CD164, SGCD, LAMA2, BTBD1, VPS13B, COL6A3, DMD, UTRN, FKTN
GO:0008104~protein localization	0.0282269	LRBA, USP9Y, ITSN1, DDX42, SEPTIN11, SEPTIN10, SEPTIN8, ARMCX3, AHI1, AKAP10, NIN, ODR4, NRCAM, DMD
GO:0031175~neuron projection development	0.0290406	RB1, PTPRU, HERC1, MAP1B, VPS13B, PTPRK, ERCC6, RAB6A, PTPRG, CAMSAP2, UHMK1
GO:1904754~positive regulation of vascular associated smooth muscle cell migration	0.0338456	IGFBP5, MDM2, MAP3K7, DDR2
GO:0046889~positive regulation of lipid biosynthetic process	0.0338456	CREB1, ZBTB20, OGT, MTOR
GO:0035556~intracellular signal transduction	0.0356763	DDX3Y, LRRC58, TFRC, ITSN1, PRKAG2, RPS6KA3, SLK, AKT3, SOCS6, MAP3K7, MARK3, PAG1, JAK1, MAP3K2, SMAD4, IGFBP5, ERBIN, MYO5A, OXSR1, MYO9A, TGFBR1, NET1, KCTD9, FER, WNK1, STK17A, DLC1
GO:0038109~Kit signaling pathway	0.0357068	PDGFRA, FER, TEK, MET, DDR2
GO:0150104~transport across blood-brain barrier	0.0373286	ABCC4, SLC38A1, SLC22A5, TFRC, SLC1A3, SLC38A2, SLC7A1, SLC5A3
GO:0045666~positive regulation of neuron differentiation	0.0373286	MMD, MAP1B, NRCAM, DMD, TCF4, ADRA2C, ETV5, BEND6
GO:0150052~regulation of postsynapse assembly	0.037579	GNA13, MAP1B, DOCK1, NECTIN3, RTN4, ARHGAP12
GO:0010628~positive regulation of gene expression	0.0395668	DDX3Y, YAP1, PRKAA1, TFRC, ROCK2, TNC, PIK3R3, FTX, TTN, PPP3CA, NAMPT, TP53INP1, RBBP9, SLC38A2, MEF2A, IL33, SMAD4, VDR, PAWR, RAB27A, TGFBR1, CLDN5, AGO3, MDM2, ERCC6
GO:0010606~positive regulation of cytoplasmic mRNA processing body assembly	0.0398997	CNOT6, CNOT6L, CNOT2
GO:0060982~coronary artery morphogenesis	0.0398997	SEC24B, ARID2, TGFBR1
GO:0000212~meiotic spindle organization	0.0398997	ATRX, MYH9, AURKA
GO:0098609~cell-cell adhesion	0.0399441	DLG1, DLG2, NEGR1, ITGA10, NRCAM, NPHP4, ITGA6, TLN2, PDLIM5, CBLL1, LPP, ITGA9
GO:0030036~actin cytoskeleton organization	0.0421781	ROCK2, MTSS1, MKLN1, FER, DIAPH2, PALLD, DLC1, NF1, MYH9, PHACTR2, NPHP4, TLN2, AMOTL1, PDLIM5, CRK, SPTBN1, PAFAH1B1
GO:0018108~peptidyl-tyrosine phosphorylation	0.0423199	PDGFRA, FER, ABL2, PTK2, DDR2
GO:0030048~actin filament-based movement	0.0429119	MYO1B, WIPF1, MYH9, MYO5A
GO:0007169~cell surface receptor protein tyrosine kinase signaling pathway	0.0454482	PDGFRA, AHI1, TEK, MET, MTSS1, PTPRG, DDR2
GO:0007179~transforming growth factor beta receptor signaling pathway	0.0491699	CLDN5, SMAD4, CAV2, USP9Y, PTPRK, SKIL, MAP3K7, SMAD5, PTK2, TGFBR1
GO:0003281~ventricular septum development	0.0495755	HECTD1, LUZP1, MDM2, TRIP11, AP2B1
GO:0016197~endosomal transport	0.0498916	ABCA1, WASHC4, VPS4B, ITSN1, TMCC1, EPS15, BLTP1, PICALM
Supp. Table 4. List of significantly upregulated (top) and downregulated (bottom) biological processes in the models of intramusuclar adipose tissue and rakend by p-Value. The group of intramuscular adipose tissue models kept at ground were used as reference.
Selected biological processes are highlighted in bold.

## Sheet: KEGG PATHWAYS
Upregulated KEGG PATHWAYS
Term	p-Value	Symbols
hsa03010:Ribosome	1.10112e-44	RPL30, RPL32, RPL34, RPLP1, MRPS11, RPLP0, MRPS12, MRPL36, RPL10A, RPL8, RPL9, MRPL4, RPS15, RPS14, RPS17, MRPL2, RPS16, RPS19, RPL18A, RPS18, RPL36, RPLP2, RPL35, RPL38, RPL37, RPS11, RPL39, RPS10, RPS13, RPS12, RPS9, RPL21, RPS7, RPS5, MRPS2, MRPS21, RPL13A, RPL37A, RPL24, RPL27, RPL29, RPL28, UBA52, RPL10, RPL12, MRPL17, MRPL14, MRPL12, MRPL11, MRPL20, RPS3, RPL13, RPS2, RPL18, RPL19, RPL41, M…
hsa05171:Coronavirus disease - COVID-19	1.17202e-28	RPL30, CXCL8, RPL32, RPL34, RPLP1, RPLP0, RPL10A, RPL8, RPL9, RPS15, RPS14, RPS17, RPS16, RPS19, RPL18A, RPS18, RPL36, RPLP2, RPL35, RPL38, RPL37, RPS11, RPL39, RPS10, RPS13, RPS12, RPS9, RPL21, RPS7, RPS5, MMP3, RPL13A, FOS, RPL37A, RPL24, RPL27, RPL29, RPL28, UBA52, CFD, RPL10, C1R, RPL12, IRAK1, RPS3, RPL13, RPS2, RPL18, RPL19, JUN, RPL41, RPL35A, RPL23A, MAPK12, NFKBIA, RPS26, RPS25, RPS28, R…
hsa00190:Oxidative phosphorylation	6.00261e-21	NDUFA13, NDUFB7, NDUFA11, NDUFB11, COX4I1, ATP5MC2, NDUFB2, ATP5MC3, NDUFB1, COX7A2, UQCR11, COX5B, COX6A1, COX7A1, COX7C, UQCRH, ATP5MC1, CYC1, ATP6V0E2, NDUFV1, ATP5MF, ATP5ME, ATP6V1F, COX8A, ATP6V0B, NDUFA6, ATP5PD, NDUFA4, NDUFA3, NDUFA2, NDUFA1, SDHC, ATP5F1D, ATP5F1E, COX6B1, NDUFS8, NDUFS7, UQCRQ, NDUFS6, NDUFS5, NDUFS3, ATP6V0D1
hsa05012:Parkinson disease	1.20682e-15	NDUFA13, NDUFA11, COX4I1, PARK7, COX6A1, COX7C, TXN2, SLC39A4, COX8A, DUSP1, SLC39A13, SDHC, TUBA4A, COX6B1, NDUFS8, NDUFS7, NDUFS6, NDUFS5, NDUFS3, UBA52, NDUFB7, NDUFB11, PSMD13, ATP5MC2, NDUFB2, ATP5MC3, NDUFB1, COX7A2, UQCR11, UBE2J2, COX5B, COX7A1, UQCRH, ATP5MC1, PSMB6, PSMB5, PSMB3, CYC1, NDUFV1, NDUFA6, ATP5PD, NDUFA4, NDUFA3, NDUFA2, NDUFA1, TUBB4B, ATP5F1D, ATP5F1E, PSMC3, UQCRQ, CALM3
hsa05016:Huntington disease	1.30811e-15	NDUFA13, NDUFA11, COX4I1, CLTB, COX6A1, COX7C, COX8A, GPX1, SDHC, TUBA4A, COX6B1, NDUFS8, NDUFS7, NDUFS6, NDUFS5, NDUFS3, STX1A, NDUFB7, NDUFB11, PSMD13, ATP5MC2, NDUFB2, ATP5MC3, NDUFB1, COX7A2, UQCR11, COX5B, COX7A1, UQCRH, ATP5MC1, PSMB6, PSMB5, PSMB3, CLTCL1, AP2S1, POLR2E, POLR2F, POLR2G, CYC1, POLR2H, POLR2I, POLR2J, NDUFV1, POLR2L, NDUFA6, ATP5PD, NDUFA4, NDUFA3, NDUFA2, NDUFA1, TUBB4B, AT…
hsa04714:Thermogenesis	7.57116e-15	NDUFA13, NDUFB7, NDUFA11, NDUFB11, COX4I1, ATP5MC2, NDUFB2, ATP5MC3, NDUFB1, COX7A2, UQCR11, COX5B, COX6A1, COX7A1, COX7C, UQCRH, ATP5MC1, MLST8, COX14, CYC1, HRAS, NDUFV1, ATP5MF, ATP5ME, COX8A, COA4, COA3, NDUFA6, ATP5PD, NDUFA4, NDUFA3, NDUFA2, NDUFA1, SDHC, ATP5F1D, ATP5F1E, MAPK12, COX6B1, NDUFAF8, NDUFS8, NDUFS7, UQCRQ, NDUFS6, NDUFS5, NDUFAF2, NDUFS3
hsa05208:Chemical carcinogenesis - reactive oxygen species	1.14222e-14	NDUFA13, NDUFB7, NDUFA11, NDUFB11, COX4I1, ATP5MC2, NDUFB2, ATP5MC3, NDUFB1, COX7A2, UQCR11, COX5B, COX6A1, COX7A1, COX7C, UQCRH, ATP5MC1, CYC1, HRAS, NDUFV1, COX8A, NQO1, JUN, NDUFA6, MAP2K2, ATP5PD, NDUFA4, BAD, NDUFA3, NDUFA2, NDUFA1, SDHC, CYBA, FOS, ATP5F1D, ATP5F1E, MAPK12, COX6B1, NFKBIA, NDUFS8, NDUFS7, UQCRQ, NDUFS6, NDUFS5, NDUFS3
hsa04932:Non-alcoholic fatty liver disease	8.9664e-14	NDUFA13, NDUFB7, CXCL8, NDUFA11, NDUFB11, COX4I1, NDUFB2, NDUFB1, COX7A2, UQCR11, COX5B, COX6A1, COX7A1, COX7C, UQCRH, CYC1, BID, NDUFV1, COX8A, JUN, NDUFA6, NDUFA4, NDUFA3, NDUFA2, NDUFA1, NR1H3, SDHC, FOS, MAPK12, COX6B1, NDUFS8, NDUFS7, UQCRQ, NDUFS6, NDUFS5, NDUFS3
hsa05010:Alzheimer disease	4.99982e-13	NDUFA13, CSF1, NDUFA11, COX4I1, COX6A1, COX7C, CAPN1, HRAS, SLC39A4, PSENEN, COX8A, MAP2K2, SLC39A13, SDHC, TUBA4A, COX6B1, NDUFS8, NDUFS7, NDUFS6, NDUFS5, NDUFS3, GAPDH, NDUFB7, NDUFB11, PSMD13, ATP5MC2, NDUFB2, ATP5MC3, NDUFB1, COX7A2, UQCR11, COX5B, COX7A1, HSD17B10, UQCRH, ATP5MC1, PSMB6, PSMB5, PSMB3, DVL2, CYC1, APBB1, APOE, BID, NDUFV1, NDUFA6, ATP5PD, BAD, NDUFA4, NDUFA3, NDUFA2, NDUFA1, …
hsa05415:Diabetic cardiomyopathy	7.53606e-13	NDUFA13, NDUFB7, NDUFA11, NDUFB11, COX4I1, ATP5MC2, NDUFB2, ATP5MC3, NDUFB1, COX7A2, UQCR11, COX5B, COX6A1, COX7A1, COX7C, UQCRH, ATP5MC1, CYC1, NDUFV1, COX8A, NDUFA6, ATP5PD, NDUFA4, NDUFA3, NDUFA2, NDUFA1, SDHC, CYBA, ATP5F1D, ATP5F1E, MAPK12, PPP1CA, COX6B1, NDUFS8, NDUFS7, UQCRQ, NDUFS6, NDUFS5, NDUFS3, GAPDH
hsa05020:Prion disease	4.61244e-12	NDUFA13, NDUFB7, NDUFA11, NDUFB11, PSMD13, COX4I1, ATP5MC2, NDUFB2, ATP5MC3, NDUFB1, COX7A2, UQCR11, COX5B, COX6A1, COX7A1, COX7C, UQCRH, ATP5MC1, PSMB6, PSMB5, PSMB3, CYC1, NDUFV1, COX8A, NDUFA6, ATP5PD, NDUFA4, BAD, NDUFA3, NDUFA2, NDUFA1, SDHC, CYBA, TUBB4B, ATP5F1D, ATP5F1E, MAPK12, TUBA4A, COX6B1, NDUFS8, PSMC3, NDUFS7, UQCRQ, NDUFS6, NDUFS5, NDUFS3
hsa05014:Amyotrophic lateral sclerosis	8.74716e-11	NDUFA13, NXT1, NDUFA11, COX4I1, COX6A1, COX7C, COX8A, GPX1, SDHC, TUBA4A, COX6B1, NDUFS8, NDUFS7, NDUFS6, NDUFS5, NDUFS3, SQSTM1, TOMM40, NDUFB7, NDUFB11, PSMD13, ATP5MC2, NDUFB2, ATP5MC3, NDUFB1, COX7A2, UQCR11, COX5B, COX7A1, UQCRH, ATP5MC1, PSMB6, PSMB5, PSMB3, CYC1, BID, NDUFV1, NDUFA6, ATP5PD, NUP155, BAD, NDUFA4, NDUFA3, NDUFA2, NDUFA1, TUBB4B, ATP5F1D, ATP5F1E, MAPK12, CCS, PSMC3, UQCRQ
hsa05022:Pathways of neurodegeneration - multiple diseases	1.15235e-10	NDUFA13, CSF1, NDUFA11, COX4I1, PARK7, COX6A1, COX7C, CAPN1, HRAS, COX8A, GPX1, MAP2K2, SDHC, TUBA4A, COX6B1, NDUFS8, NDUFS7, NDUFS6, NDUFS5, NDUFS3, UBA52, SQSTM1, STX1A, TOMM40, NDUFB7, NDUFB11, PSMD13, ATP5MC2, NDUFB2, ATP5MC3, NDUFB1, COX7A2, UQCR11, UBE2J2, COX5B, COX7A1, HSD17B10, UQCRH, ATP5MC1, PSMB6, PSMB5, PSMB3, DVL2, CYC1, BID, NDUFV1, NDUFA6, ATP5PD, BAD, NDUFA4, NDUFA3, NDUFA2, NDUF…
hsa01100:Metabolic pathways	1.20107e-09	NDUFA13, NDUFA11, PGAP3, DGKA, COMT, COX6A1, HDDC3, NSDHL, UROD, NUDT16, CHAC1, PSPH, GAMT, ARSA, PCYT2, OXSM, HSD11B1L, TALDO1, SDHC, COX6B1, DPM2, DPM3, DGKQ, HMBS, ACOT2, ATP6V0D1, PTGES, PFKFB4, NDUFB11, SHMT2, ATP5MC2, ATP5MC3, COX7A2, NTPCR, SDSL, COX7A1, ACAT2, PLD3, UQCRH, ATP5MC1, CYC1, NDUFV1, ATP5MF, ATP5ME, ATP6V1F, MPST, PMM1, PYCR1, MCAT, COQ4, COQ3, GRHPR, G6PC3, B4GAT1, UQCRQ, TBX…
hsa01230:Biosynthesis of amino acids	0.000427147	TPI1, SHMT2, IDH3G, PYCR1, TALDO1, SDSL, ASS1, PFKL, ALDOA, TKT, GAPDH, PSPH, BCAT2
hsa01232:Nucleotide metabolism	0.00134658	DTYMK, NME2, NME3, NME4, NTPCR, APRT, NME1, NT5C3B, GUK1, UPP1, NUDT16, ADA, ITPA
hsa04723:Retrograde endocannabinoid signaling	0.00175305	NDUFA13, NDUFB7, NDUFA6, NDUFA11, NDUFB11, NDUFA4, NDUFA3, NDUFA2, NDUFB2, NDUFA1, NDUFB1, MAPK12, NDUFS8, NDUFS7, NDUFS6, NDUFS5, NDUFS3, NDUFV1
hsa01240:Biosynthesis of cofactors	0.00250145	NQO1, PDXK, ALAS1, PMM1, MMAB, SHMT2, OXSM, NME2, NME3, GGH, NME4, NME1, COQ4, COQ3, UROD, NAPRT, HMBS, BCAT2
hsa04260:Cardiac muscle contraction	0.00505714	COX8A, UQCRQ, COX4I1, COX7A2, UQCR11, CYC1, COX5B, COX6A1, COX7A1, COX7C, UQCRH, COX6B1
hsa01200:Carbon metabolism	0.00682415	TPI1, SHMT2, IDH3G, TALDO1, SDHC, SDSL, ACAT2, PFKL, PGLS, ALDOA, TKT, ACADS, GAPDH, PSPH
hsa03020:RNA polymerase	0.0072838	POLR2E, POLR2F, POLR2G, POLR2H, POLR2I, POLR2J, POLR2L
hsa03420:Nucleotide excision repair	0.0154072	RPA3, POLD2, POLR2E, POLR2F, POLR2G, POLR2H, POLR2I, POLR2J, POLR2L
hsa04218:Cellular senescence	0.0158906	MAP2K2, CXCL8, CDKN2A, HLA-B, HLA-C, HLA-A, MAPK12, PPP1CA, HLA-E, MRAS, RRAS, CDK4, CALM3, CAPN1, HRAS, SQSTM1
hsa04137:Mitophagy - animal	0.0196555	FIS1, JUN, TOMM40, MRAS, RRAS, CITED2, LOC107986346, TOMM7, HRAS, PHB2, SQSTM1, UBA52
hsa00051:Fructose and mannose metabolism	0.0293079	PFKFB4, PFKL, TPI1, PMM1, GFUS, ALDOA
Downregulated KEGG PATHWAYS
Term	p-Value	Symbols
hsa04510:Focal adhesion	0.000699227	PDGFRA, PPP1R12A, LAMA2, ROCK2, CAV2, PTEN, TNC, PIK3R3, THBS2, PTK2, PPP1CC, CCND2, ITGA10, AKT3, COL6A3, ITGA6, TLN2, DOCK1, MET, CRK, SOS2, ITGA9
hsa04810:Regulation of actin cytoskeleton	0.00134083	NCKAP1, PDGFRA, ACTR2, PPP1R12A, ROCK2, PIK3R3, IQGAP1, PTK2, GNA13, ENAH, PPP1CC, DIAPH2, ITGA10, AKT3, BDKRB1, MYH9, ITGA6, DOCK1, CRK, SOS2, ITGA9, ARHGEF6
hsa05165:Human papillomavirus infection	0.00251748	RB1, LAMA2, PTEN, TNC, UBR4, PIK3R3, UBE3A, THBS2, CCND2, HEY1, AKT3, CREB3L2, JAK1, FZD6, EIF2AK2, MTOR, PTK2, DLG1, DLG2, CREB1, ITGA10, MDM2, COL6A3, ITGA6, SOS2, ITGA9, ATR, IFNAR1
hsa04630:JAK-STAT signaling pathway	0.00431419	PDGFRA, PIK3R3, LIFR, MTOR, CCND2, AKT3, IL6ST, SOCS6, STAM2, SOS2, JAK1, IL13RA1, IFNAR1
hsa04151:PI3K-Akt signaling pathway	0.0116639	PDGFRA, PRKAA1, LAMA2, PTEN, TNC, PIK3R3, THBS2, MTOR, PTK2, EREG, CREB1, CCND2, ITGA10, AKT3, CREB3L2, MDM2, COL6A3, ITGA6, TEK, MET, SOS2, ITGA9, JAK1, IFNAR1
hsa05410:Hypertrophic cardiomyopathy	0.0127793	PRKAA1, SGCD, LAMA2, ITGA10, PRKAG2, ITGA6, DMD, SNTB1, ITGA9, TTN
hsa05100:Bacterial invasion of epithelial cells	0.0160708	ACTR2, CAV2, CLTC, PIK3R3, DOCK1, CRK, MET, PTK2, SEPTIN11, SEPTIN8
hsa04550:Signaling pathways regulating pluripotency of stem cells	0.0191397	SMAD4, PCGF5, PCGF3, AKT3, FZD6, SMARCAD1, PIK3R3, LIFR, IL6ST, SKIL, SMAD5, JAK1
hsa04931:Insulin resistance	0.0209184	RPS6KA3, PPP1CC, PRKAA1, CREB1, AKT3, GFPT1, CREB3L2, PTEN, PIK3R3, PRKAG2, OGT, MTOR
hsa04820:Cytoskeleton in muscle cells	0.0239457	LAMA2, AMPD3, THBS2, TTN, SYNE1, DIAPH2, VCAN, SGCD, ITGA10, COL6A3, MYH9, ITGA6, DMD, TLN2, PDLIM5, LBR, SNTB1, SPTBN1, ITGA9
hsa04514:Cell adhesion molecules	0.025914	CLDN5, VCAN, ALCAM, NEGR1, CLDN12, NRCAM, ITGA6, NECTIN3, ITGA9
hsa04520:Adherens junction	0.0272365	FER, SMAD4, ROCK2, ARHGAP29, LMO7, IQGAP1, MAP3K7, MET, NECTIN3, SSX2IP, TGFBR1
hsa04022:cGMP-PKG signaling pathway	0.0330175	MEF2A, PPP1R12A, ROCK2, ATP2B1, ADRA2C, GNA13, PPP3CA, PPP1CC, EDNRA, PPP3CB, CREB1, AKT3, CREB3L2
hsa04512:ECM-receptor interaction	0.0337493	LAMA2, ITGA10, TNC, COL6A3, ITGA6, CD47, THBS2, ITGA9
hsa05215:Prostate cancer	0.0351381	RB1, PDGFRA, CREB1, AKT3, CREB3L2, PTEN, MDM2, PIK3R3, SOS2, ETV5, MTOR
hsa01521:EGFR tyrosine kinase inhibitor resistance	0.0425778	PDGFRA, AKT3, PTEN, NF1, PIK3R3, MET, SOS2, MTOR, JAK1
hsa05206:MicroRNAs in cancer	0.0497811	PDGFRA, PTEN, TNC, PIK3R3, KIF23, DICER1, SLC7A1, MTOR, CCND2, MDM2, CYP1B1, MET, CRK, SOS2
Supp. Table 4. List of significantly upregulated (top) and downregulated (bottom) KEGG pathaways in the models of intramusuclar adipose tissue and rakend by p-Value. The group of intramuscular adipose tissue models kept at ground were used as reference.
Selected KEGG PATHWAYS are highlighted in bold.

## Sheet: WIKIPATHWAYS
Upregulated WIKI PATHWAYS
Term	p-Value	Symbols
WP477:Cytoplasmic ribosomal proteins	4.74778e-48	RPL30, RPL32, RPL34, RPLP1, RPLP0, RPL10A, RPL8, RPL9, RPS15, RPS14, RPS17, RPS16, RPS19, RPL18A, RPS18, RPL36, RPLP2, RPL35, RPL38, RPL37, RPS11, RPL39, RPS10, RPS13, RPS12, RPS9, RPL21, RPS7, RPS5, RPL13A, RPL37A, RPL24, RPL27, RPL29, RPL28, UBA52, RPL10, RPL12, RPS3, RPL13, RPS2, RPL18, RPL19, RPL41, RPL35A, RPL23A, RPS26, RPS25, RPS28, RPS27, RPS29, RPL27A, RPS20, FAU, RPS21
WP111:Electron transport chain OXPHOS system in mitochondria	5.11181e-21	NDUFA13, NDUFB7, NDUFA11, COX4I1, ATP5MC2, NDUFB2, ATP5MC3, NDUFB1, COX7A2, UQCR11, COX5B, COX6A1, COX7A1, COX7C, UQCRH, ATP5MC1, ATP5IF1, NDUFV1, ATP5MF, ATP5ME, COX8A, NDUFA6, ATP5PD, NDUFA4, NDUFA3, NDUFA2, NDUFA1, SDHC, ATP5F1D, ATP5F1E, COX6B1, NDUFS8, NDUFS7, UQCRQ, NDUFS6, NDUFS5, NDUFS3
WP623:Oxidative phosphorylation	6.14316e-13	NDUFB7, ATP5PD, NDUFA6, NDUFA11, NDUFA4, NDUFA3, NDUFA2, NDUFB2, ATP5MC2, NDUFB1, ATP5MC3, ATP5F1D, ATP5F1E, ATP5MC1, NDUFS8, NDUFS7, NDUFS6, NDUFS5, NDUFS3, NDUFV1, ATP5MF, ATP5ME
WP4396:Nonalcoholic fatty liver disease	1.12825e-12	NDUFA13, NDUFB7, CXCL8, NDUFA11, NDUFB11, COX4I1, NDUFB2, NDUFB1, COX7A2, UQCR11, COX5B, COX6A1, COX7A1, COX7C, UQCRH, CYC1, BID, NDUFV1, COX8A, JUN, NDUFA6, NDUFA4, NDUFA3, NDUFA2, NDUFA1, NR1H3, SDHC, COX6B1, NDUFS8, NDUFS7, UQCRQ, NDUFS6, NDUFS5, NDUFS3
WP4324:Mitochondrial complex I assembly model OXPHOS system	5.54053e-07	NDUFA13, NDUFB7, NDUFA6, DMAC1, NDUFB11, NDUFA3, NDUFA2, NDUFB2, NDUFA1, NDUFB1, NDUFS6, NDUFS5, NDUFAF2, NDUFS3, NDUFV1
WP4922:Mitochondrial complex IV assembly	4.82028e-06	COX8A, COA3, PET100, NDUFA4, COX4I1, COX7A2, COX14, COX5B, COX6A1, COX7C, COX6B1
WP4921:Mitochondrial complex III assembly	0.000937161	UQCRQ, UQCC2, UQCR11, CYC1, BCS1L, UQCRH
WP183:Proteasome degradation	0.00109068	H2AX, PSMB6, PSMB5, PSMC3, PSMD13, PSMB3, HLA-B, HLA-C, HLA-A, PSMB9, HLA-E
WP4022:Pyrimidine metabolism	0.00109542	DTYMK, NME2, NME3, NME4, NME1, POLD2, POLR2E, POLR2G, UPP1, POLR2H, POLR2I, POLR2J, POLR2L
WP5380:5q35 copy number variation	0.00152014	H2AX, COX8A, JUN, PRR7, PRELID1, COX4I1, CLTB, COX5B, COX6A1, COX7A1, COX7C, COX6B1, HIGD2A, LMAN2, DBN1
WP28:Selenium metabolism and selenoproteins	0.00238629	SELENBP1, RPL30, SELENOM, JUN, GPX1, GPX4, SELENOW, FOS, MSRB1
WP3888:VEGFA VEGFR2 signaling	0.0078923	CXCL8, CCDC124, HSPB1, RPL10A, RPL18A, HLX, BSG, AP2S1, MLST8, RPLP2, CHAC1, RPS11, HRAS, TMSB10, JUN, SDF2L1, MAP2K2, GPX1, SSR4, RPL13A, RHOC, MAPK12, PGF, PPP1CA, NFKBIA, DOK1, BIN1, GIPC1, RPL27, ATP6V0D1, ALDOA, TKT, FJX1, GAPDH, PTMA
WP1772:Apoptosis modulation and signaling	0.0187796	NFKBIA, JUN, ENDOG, IRAK1, CDKN2A, BAD, PTRH2, TOLLIP, TRADD, FOS, BID
WP4290:Metabolic reprogramming in colon cancer	0.0190532	PFKL, SHMT2, PYCR1, TALDO1, TKT, GAPDH, PSPH
WP497:Urea cycle and metabolism of amino groups	0.0202437	GAMT, PYCR1, CKB, ASS1, SRM
WP5026:Proline and hydroxyproline pathways	0.0235727	ALDH4A1, PYCR1, PEPD
WP422:MAPK cascade	0.0249156	JUN, MAP2K2, RRAS, HRAS, MAPK12, SIPA1
WP408:Oxidative stress response	0.0249156	NQO1, GPX1, FOS, SOD3, JUNB, TXN2
WP3612:Photodynamic therapy induced NFE2L2 NRF2 survival signaling	0.0276426	NQO1, JUN, GSTP1, FOS, MAPK12
WP3391:Senescence associated secretory phenotype SASP	0.0295501	H2AX, CDKN2D, H2AJ, JUN, CXCL8, CDKN2A, UBE2S, CDK4, H2AC20, FOS, UBA52, ANAPC11
WP5222:2q13 copy number variation syndrome	0.0410323	LGALS3, CHCHD5, CSF1, POLR2E, POLR2F, POLR2H, GAS6, POLR2L
WP2447:Amyotrophic lateral sclerosis ALS	0.0428533	CCS, TOMM40, MAP2K2, GPX1, BAD, BID
WP134:Pentose phosphate metabolism	0.0462456	TALDO1, PGLS, TKT
WP4932:7q11 23 copy number variation syndrome	0.0468116	H2AX, TBL2, ATP5MC2, MVB12A, ATP5MC3, ATP5F1D, GAPDH, SQSTM1, ATP5F1E, STX1A, ATP5MC1
Downregulated WIKI PATHWAYS
Term	p-Value	Symbols
WP2005:miR targeted genes in muscle cell	2.71427e-05	RB1, SEC23A, LUZP1, UAP1, ARID4B, SLC7A11, LCLAT1, BACH1, NAPG, RTN4, SYNE1, GNA13, PPP3CA, CAND1, PODXL, TP53INP1, CYP1B1, RAB6A, PDLIM5, SLC38A2, POGLUT3, SRSF10, VPS39, SLC25A24, CD164, SLC38A1, NCOA3, ATRX, GFPT1, SCAMP1, HIPK3, PTBP2, GRIK1-AS2, DMTF1, AGO3, PSAT1, MTHFD2, WDFY1, MET, PAFAH1B2, PICALM
WP1984:Integrated breast cancer pathway	0.000306907	RB1, RALA, SMAD4, NCOA3, NAB1, PTEN, PPP4R3A, PPP4R3B, HMGCR, BACH1, TGFBR1, MTOR, AURKA, FER, GRIK1-AS2, CREB1, CHEK1, MDM2, NF1, ATR, JAK1
WP2004:miR targeted genes in lymphocytes	0.00119024	RB1, SEC23A, LUZP1, NPR3, UAP1, ARID4B, LCLAT1, BACH1, NAPG, RTN4, SYNE1, GNA13, PPP3CA, PURA, CAND1, TP53INP1, CYP1B1, RAB6A, ARID2, PDLIM5, SLC38A2, POGLUT3, SRSF10, VPS39, SLC25A24, CD164, SLC38A1, NCOA3, ATRX, GFPT1, SCAMP1, HIPK3, PTBP2, GRIK1-AS2, DMTF1, AGO3, PSAT1, MTHFD2, WDFY1, MET, PAFAH1B2, PICALM
WP306:Focal adhesion	0.00210643	PDGFRA, PPP1R12A, LAMA2, ROCK2, CAV2, PTEN, TNC, PIK3R3, THBS2, PTK2, PPP1CC, CCND2, ITGA10, AKT3, ITGA6, TLN2, DOCK1, MET, CRK, ITGA9
WP4539:Synaptic signaling associated with autism spectrum disorder	0.00279093	PRKAA1, AKT3, PTEN, NF1, PIK3R3, PRKAG2, UBE3A, MTOR
WP3931:Embryonic stem cell pluripotency pathways	0.00417466	ACTR2, PDGFRA, SMAD4, AKT3, FZD6, PTEN, MDM2, LIFR, IL6ST, SMAD5, MTOR, JAK1
WP437:EGF EGFR signaling	0.00511667	MEF2A, MAP3K2, RALA, CAV2, NCOA3, PTEN, ASAP1, AP2B1, IQGAP1, MTOR, PTK2, RPS6KA3, CREB1, EPS15, STAM2, CRK, SOS2, JAK1
WP4172:PI3K Akt signaling	0.00735161	PDGFRA, PRKAA1, LAMA2, PTEN, TNC, PIK3R3, THBS2, MTOR, PTK2, CREB1, CCND2, ITGA10, AKT3, CREB3L2, MDM2, COL6A3, ITGA6, TEK, MET, SOS2, ITGA9, JAK1, IFNAR1
WP1971:Integrated cancer pathway	0.00986831	RB1, GRIK1-AS2, CHEK1, PTEN, MDM2, BACH1, ATR, JAK1
WP51:Regulation of actin cytoskeleton	0.0111119	NCKAP1, PDGFRA, PPP1R12A, ROCK2, PIK3R3, IQGAP1, PTK2, GNA13, ENAH, BDKRB1, DOCK1, CRK, SOS2, ARHGEF6
WP5494:Tyrosine kinase inhibitors in glioblastoma	0.0119691	AKT3, PTEN, SOS2, MTOR, JAK1, EREG
WP2858:Ectoderm differentiation	0.0230964	ABCC4, AHI1, SMAD4, ELOVL4, PODXL, PRKAG2, DMD, PDE7A, SKIL, OGT, TRIM33, RAB8B
WP5470:Effect of omega 3 PUFA on Huntington 39 s disease pathways	0.0282514	ABCA1, AHI1, PRKAA1, CREB1, OPA1, AKT3, PTEN, PIK3R3, PRKAG2, HMGCR, MTOR
WP5490:Inhibition of GNAQ regulated signaling in uveal melanoma	0.0339202	YAP1, TRIO, AKT3, PIK3R3, PTK2, MTOR
WP4963:p53 transcriptional gene network	0.0346051	PRKAA1, RRM2B, SESN1, TP53INP1, PTEN, PRKAG2, SLC7A11, ULBP1, MTOR, AURKA
WP4674:Head and neck squamous cell carcinoma	0.0388171	RB1, FKBP1A, SMAD4, PRKAA1, SESN1, AKT3, PTEN, NUMB, MTOR
WP3932:Focal adhesion PI3K Akt mTOR signaling	0.0398385	PDGFRA, PRKAA1, LAMA2, PTEN, TNC, THBS2, MTOR, PTK2, CREB1, RAB14, ITGA10, AKT3, CREB3L2, MDM2, ITGA6, TEK, MET, ITGA9, JAK1, IFNAR1
WP5083:Neuroinflammation and glutamatergic signaling	0.0451594	PPP1CC, SLC38A1, SMAD4, CREB1, PSAT1, SLC1A3, IL6ST, SLC38A2, TGFBR1, JAK1, IL13RA1
WP4685:Melanoma	0.047556	RB1, CREB1, AKT3, PTEN, MDM2, NF1, PIK3R3, SOS2
WP4541:Hippo Merlin signaling dysregulation	0.0479392	YAP1, PDGFRA, PPP1CC, PPP1R12A, ITGA10, ITGA6, TEK, MET, PTK2, ITGA9
Supp. Table 4. List of significantly upregulated (top) and downregulated (bottom) WIKI PATHWAYS in the models of intramusuclar adipose tissue and rakend by p-Value. The group of intramuscular adipose tissue models kept at ground were used as reference.
Selected WIKI PATHWAYS are highlighted in bold.
