# Supplementary material for: Transcriptomic Profiling of Muscle-Derived Stromal and Adipocytes Cells Exposed to Suborbital Microgravity
Source: Research Square preprint supplement (doi:10.21203/rs.3.rs-7745208/v1), 2025-12-10
Supplement: Supplementary file 4 [file ce81e95c8e9a10fd7545281c.xlsx]

## Sheet: UPREGULATED DEG
ensembl	Symbol	LogFC	p-Value	FDR < 0.05
ENSG00000198743	SLC5A3	3.5484	3.67124e-08	*
ENSG00000169184	MN1	6.80175	1.01029e-07	*
ENSG00000164879	CA3	2.83655	9.58413e-07	*
ENSG00000182107	TMEM30B	3.15095	2.22432e-05	*
ENSG00000204262	COL5A2	0.821546	2.9279e-05	*
ENSG00000239922		2.43158	3.42539e-05	*
ENSG00000041982	TNC	1.11389	9.22365e-05
ENSG00000163359	COL6A3	0.721791	0.000151874
ENSG00000182253	SYNM	5.53322	0.000220352
ENSG00000245848	CEBPA	4.94459	0.000328543
ENSG00000196159	FAT4	4.01533	0.000342922
ENSG00000138119	MYOF	0.722065	0.000393385
ENSG00000109118	PHF12	2.34691	0.000397043
ENSG00000056998	GYG2	5.03818	0.000400074
ENSG00000075292	ZNF638	0.711352	0.000461191
ENSG00000187240	DYNC2H1	1.31467	0.000493974
ENSG00000127951	FGL2	2.20562	0.000619636
ENSG00000172037	LAMB2	0.724423	0.000688053
ENSG00000142949	PTPRF	2.14847	0.000757011
ENSG00000138468	SENP7	1.35922	0.000932659
ENSG00000076555	ACACB	2.00823	0.00112267
ENSG00000147133	TAF1	2.3677	0.00130492
ENSG00000166147	FBN1	0.675934	0.00132633
ENSG00000185722	ANKFY1	1.15825	0.00151094
ENSG00000157500	APPL1	1.12179	0.00160411
ENSG00000066084	DIP2B	1.29247	0.00164612
ENSG00000013588	GPRC5A	2.8818	0.00175543
ENSG00000047578	KATNIP	1.85468	0.00182878
ENSG00000092969	TGFB2	1.89198	0.00185189
ENSG00000304836		1.95001	0.00191073
ENSG00000137872	SEMA6D	4.49187	0.00196305
ENSG00000164307	ERAP1	0.944401	0.0020754
ENSG00000196932	TMEM26	3.5909	0.00224708
ENSG00000269821	KCNQ1OT1	2.33055	0.00233061
ENSG00000108821	COL1A1	0.615222	0.00246743
ENSG00000146263	MMS22L	2.72283	0.00265706
ENSG00000100027	YPEL1	2.61024	0.00286682
ENSG00000198440	ZNF583	0.977225	0.00303168
ENSG00000089154	GCN1	0.686241	0.00304509
ENSG00000143971	ETAA1	0.99441	0.00320479
ENSG00000157741	UBN2	2.51889	0.00323133
ENSG00000267508	ZNF285	2.33102	0.00360817
ENSG00000259847	LINC02126	1.58419	0.00366489
ENSG00000102935	ZNF423	1.83779	0.00374253
ENSG00000076201	PTPN23	1.56599	0.00381139
ENSG00000173889	PHC3	1.35056	0.00386341
ENSG00000113441	LNPEP	1.46796	0.00395612
ENSG00000054793	ATP9A	1.05096	0.00397332
ENSG00000099260	PALMD	1.11645	0.00412987
ENSG00000065413	ANKRD44	1.60914	0.00436828
ENSG00000168542	COL3A1	0.509624	0.00440673
ENSG00000073464	CLCN4	2.14687	0.00552805
ENSG00000115414	FN1	0.825894	0.00567455
ENSG00000121753	ADGRB2	2.13963	0.00600966
ENSG00000099250	NRP1	0.463813	0.00643609
ENSG00000181804	SLC9A9	0.641398	0.00660377
ENSG00000129422	MTUS1	1.39879	0.00790704
ENSG00000123358	NR4A1	1.64074	0.00823416
ENSG00000187498	COL4A1	0.49753	0.00883363
ENSG00000164692	COL1A2	0.458484	0.00920533
ENSG00000144821	MYH15	2.76544	0.0100022
ENSG00000214548	MEG3	0.659559	0.0103002
ENSG00000135862	LAMC1	0.507637	0.010595
ENSG00000130635	COL5A1	0.538718	0.0115985
ENSG00000108848	LUC7L3	0.509431	0.0116854
ENSG00000246430	LINC00968	1.44871	0.0117987
ENSG00000100592	DAAM1	1.01998	0.0119813
ENSG00000135905	DOCK10	1.11513	0.0121216
ENSG00000049323	LTBP1	0.496753	0.0124183
ENSG00000069702	TGFBR3	0.711516	0.0130432
ENSG00000101333	PLCB4	1.81983	0.0131479
ENSG00000165124	SVEP1	0.904741	0.0139404
ENSG00000130158	DOCK6	0.942846	0.0141329
ENSG00000072121	ZFYVE26	1.61874	0.0141602
ENSG00000074695	LMAN1	0.489178	0.0143853
ENSG00000184271	POU6F1	2.14481	0.0144286
ENSG00000170558	CDH2	0.731069	0.0145303
ENSG00000110422	HIPK3	0.670109	0.0146466
ENSG00000137275	RIPK1	0.715336	0.0147921
ENSG00000173193	PARP14	1.78248	0.0149771
ENSG00000096696	DSP	0.794773	0.0151238
ENSG00000065060	BLTP3A	1.73577	0.0152136
ENSG00000273148	LCDR	2.34385	0.0153951
ENSG00000115841	RMDN2	0.691854	0.0154568
ENSG00000134871	COL4A2	0.564539	0.0166352
ENSG00000162402	USP24	1.13763	0.0170552
ENSG00000137871	ZNF280D	1.12814	0.0170947
ENSG00000242125	SNHG3	1.04789	0.0174115
ENSG00000244879	GABPB1-AS1	0.841746	0.0178285
ENSG00000095015	MAP3K1	1.98921	0.0187031
ENSG00000137573	SULF1	0.746815	0.0187288
ENSG00000116962	NID1	0.467502	0.0190537
ENSG00000005059	MCUB	0.527863	0.0193085
ENSG00000132680	KHDC4	1.08587	0.019736
ENSG00000176909	MAMSTR	2.00854	0.0197673
ENSG00000124486	USP9X	0.765484	0.0200888
ENSG00000117139	KDM5B	0.548337	0.0202673
ENSG00000245532	NEAT1	0.658921	0.0205115
ENSG00000186469	GNG2	0.578443	0.0212112
ENSG00000080573	COL5A3	0.693295	0.021239
ENSG00000164754	RAD21	0.568177	0.0212543
ENSG00000144935	TRPC1	1.04896	0.0215099
ENSG00000114742	WDR48	0.811987	0.0218342
ENSG00000237440	ZNF737	1.64791	0.0220399
ENSG00000223745	CCDC18-AS1	1.0374	0.022139
ENSG00000134313	KIDINS220	0.622496	0.0226215
ENSG00000148019	CEP78	0.835615	0.0233192
ENSG00000182580	EPHB3	1.62048	0.0233324
ENSG00000115255	REEP6	0.885263	0.0234985
ENSG00000037637	FBXO42	0.621602	0.0237636
ENSG00000011028	MRC2	0.631071	0.0238485
ENSG00000151208	DLG5	1.50135	0.0242661
ENSG00000004799	PDK4	0.403706	0.0244492
ENSG00000124198	ARFGEF2	0.919604	0.0244817
ENSG00000178163	ZNF518B	0.629964	0.024643
ENSG00000111799	COL12A1	1.18073	0.024767
ENSG00000005249	PRKAR2B	1.90737	0.0254754
ENSG00000140396	NCOA2	2.17362	0.0258364
ENSG00000054392	HHAT	1.70072	0.0263343
ENSG00000121297	TSHZ3	1.07824	0.0264026
ENSG00000107758	PPP3CB	0.826816	0.0264057
ENSG00000137817	PARP6	0.593826	0.0265745
ENSG00000227036	LINC00511	2.01117	0.0268129
ENSG00000198689	SLC9A6	0.931368	0.0272254
ENSG00000163755	HPS3	0.568159	0.0273151
ENSG00000164535	DAGLB	0.688	0.0275844
ENSG00000116580	GON4L	0.91867	0.0276306
ENSG00000091136	LAMB1	0.366899	0.0277597
ENSG00000125875	TBC1D20	0.425313	0.0278522
ENSG00000152894	PTPRK	0.628145	0.0281235
ENSG00000187955	COL14A1	1.07833	0.028189
ENSG00000175426	PCSK1	0.545717	0.0283805
ENSG00000180611	MB21D2	0.858536	0.0284108
ENSG00000206560	ANKRD28	0.767559	0.0285223
ENSG00000051009	FHIP1B	0.934407	0.0286341
ENSG00000196290	NIF3L1	0.461094	0.0289047
ENSG00000185585	OLFML2A	0.915929	0.0292521
ENSG00000132424	PNISR	0.426003	0.0295903
ENSG00000187189	TSPYL4	0.965848	0.0302181
ENSG00000105426	PTPRS	1.1424	0.0303478
ENSG00000115020	PIKFYVE	1.28079	0.0303659
ENSG00000196569	LAMA2	0.454138	0.0305167
ENSG00000196576	PLXNB2	0.498259	0.0306461
ENSG00000155893	PXYLP1	0.538639	0.0311397
ENSG00000166272	WBP1L	0.790777	0.0312143
ENSG00000256043	CTSO	0.487158	0.0313579
ENSG00000077235	GTF3C1	0.467952	0.0318467
ENSG00000182612	TSPAN10	1.17936	0.0330865
ENSG00000221963	APOL6	0.852213	0.0331378
ENSG00000108587	GOSR1	0.571652	0.0338782
ENSG00000197989	SNHG12	1.18121	0.0339722
ENSG00000127914	AKAP9	0.776135	0.0344845
ENSG00000136059	VILL	1.60849	0.0346639
ENSG00000179295	PTPN11	0.583591	0.0352506
ENSG00000049540	ELN	0.722873	0.0357372
ENSG00000017427	IGF1	2.73907	0.035764
ENSG00000104447	TRPS1	0.78214	0.0358869
ENSG00000144152	FBLN7	1.52537	0.0359386
ENSG00000070371	CLTCL1	0.817853	0.0362282
ENSG00000119906	SLF2	0.78984	0.0370289
ENSG00000170260	ZNF212	1.11345	0.0371113
ENSG00000214106	PAXIP1-AS2	0.781917	0.0372528
ENSG00000137809	ITGA11	0.572956	0.0372604
ENSG00000134569	LRP4	1.88245	0.0376869
ENSG00000178105	DDX10	0.668098	0.0388365
ENSG00000145388	METTL14	0.795783	0.0391432
ENSG00000157106	SMG1	1.21956	0.0393426
ENSG00000086589	RBM22	0.492084	0.0396882
ENSG00000164306	PRIMPOL	0.608979	0.0399858
ENSG00000178229	ZNF543	1.70683	0.0403534
ENSG00000138207	RBP4	1.21917	0.0411382
ENSG00000120832	MTERF2	0.684575	0.041323
ENSG00000133466	C1QTNF6	0.776667	0.0416013
ENSG00000106624	AEBP1	0.478972	0.0420126
ENSG00000111224	PARP11	1.56288	0.0421733
ENSG00000198265	HELZ	0.81096	0.0428969
ENSG00000026652	AGPAT4	0.98569	0.0429014
ENSG00000081026	MAGI3	1.69153	0.0432957
ENSG00000159788	RGS12	0.737494	0.0433827
ENSG00000290993		1.34355	0.0444
ENSG00000158079	PTPDC1	0.973033	0.0445617
ENSG00000182871	COL18A1	0.485774	0.0448218
ENSG00000137776	SLTM	0.432507	0.0450987
ENSG00000111450	STX2	0.541086	0.0454842
ENSG00000109743	BST1	0.691826	0.045554
ENSG00000115504	EHBP1	0.62252	0.0457685
ENSG00000160917	CPSF4	0.657386	0.0458209
ENSG00000129933	MAU2	0.856322	0.0459131
ENSG00000125482	TTF1	0.718467	0.0459985
ENSG00000142961	MOB3C	0.986086	0.0460412
ENSG00000186300	ZNF555	1.54554	0.0463956
ENSG00000122008	POLK	0.625876	0.046458
ENSG00000186260	MRTFB	1.21549	0.0465668
ENSG00000124193	SRSF6	0.559553	0.0466528
ENSG00000079462	PAFAH1B3	0.795203	0.0468494
ENSG00000073614	KDM5A	0.562518	0.0471746
ENSG00000132122	SPATA6	0.645812	0.0475571
ENSG00000250337	PURPL	0.741642	0.0476554
ENSG00000138395	CDK15	1.41725	0.048331
ENSG00000072310	SREBF1	0.524885	0.0483561
ENSG00000152527	PLEKHH2	1.41262	0.0486386
ENSG00000167920	KRT10-AS1	0.468248	0.0487394
ENSG00000173926	MARCHF3	0.969363	0.0491153
ENSG00000196177	ACADSB	0.796192	0.0492445
ENSG00000134987	WDR36	0.594713	0.0493443
ENSG00000143093	STRIP1	0.604964	0.0493805
ENSG00000168813	ZNF507	0.937335	0.0495632
ENSG00000171603	CLSTN1	0.606857	0.0497128
Supp. Table1. Complete list of DEG significantly upregulated genes (p-value <0.05) on the model of skeletal muscle stroma subjected to space exposome exposure (n=3) compared to the ground control (n=3) in logFC.
Non-protein-coding DEG are highlight in italic. * = FDR < 0.05.

## Sheet: DOWN REGULATED DEG
ensembl	Symbol	LogFC	p-Value	FDR < 0.05
ENSG00000092345	DAZL	-8.2089	1.05381e-08	*
ENSG00000107317	PTGDS	-0.864612	1.93182e-06	*
ENSG00000105516	DBP	-2.09153	2.53468e-06	*
ENSG00000095587	TLL2	-5.3274	2.16721e-05	*
ENSG00000087301	TXNDC16	-2.46879	0.000114002
ENSG00000135077	HAVCR2	-2.27148	0.000189807
ENSG00000165675	ENOX2	-1.00393	0.000270885
ENSG00000185924	RTN4RL1	-2.22869	0.000289243
ENSG00000160862	AZGP1	-2.63619	0.000531153
ENSG00000064205	CCN5	-0.664314	0.000729065
ENSG00000143363	PRUNE1	-1.1714	0.000942612
ENSG00000108515	ENO3	-1.21874	0.00127626
ENSG00000122180	MYOG	-1.4673	0.00129242
ENSG00000156671	SAMD8	-0.834385	0.00145483
ENSG00000275066	SYNRG	-1.1311	0.00156578
ENSG00000170271	FAXDC2	-1.608	0.00206489
ENSG00000175567	UCP2	-1.50182	0.00256769
ENSG00000143494	VASH2	-3.22611	0.00275697
ENSG00000109436	TBC1D9	-1.44299	0.00324173
ENSG00000169297	NR0B1	-3.305	0.00336483
ENSG00000250320	EDIL3-DT	-1.74147	0.00341775
ENSG00000175928	LRRN1	-4.62074	0.00356153
ENSG00000187837	H1-2	-0.825582	0.00408101
ENSG00000168004	PLAAT5	-3.84326	0.00411657
ENSG00000068976	PYGM	-2.4861	0.00421017
ENSG00000151065	DCP1B	-0.861387	0.00460885
ENSG00000167676	PLIN4	-2.09032	0.00592808
ENSG00000136874	STX17	-0.921245	0.00619154
ENSG00000215105		-1.38566	0.00650747
ENSG00000102683	SGCG	-1.58457	0.00677464
ENSG00000242259	C22orf39	-0.548331	0.00689732
ENSG00000153446	C16orf89	-3.50272	0.00707002
ENSG00000134504	KCTD1	-1.39982	0.00824876
ENSG00000175573	C11orf68	-0.522485	0.00833737
ENSG00000162643	DNAI3	-1.22743	0.00837333
ENSG00000151790	TDO2	-3.10156	0.00847756
ENSG00000143632	ACTA1	-1.33308	0.00875299
ENSG00000156471	PTDSS1	-0.388827	0.00884901
ENSG00000172432	GTPBP2	-0.763835	0.00908366
ENSG00000293110		-2.54712	0.00915431
ENSG00000022976	ZNF839	-1.41015	0.00970594
ENSG00000136235	GPNMB	-0.384773	0.0100674
ENSG00000159173	TNNI1	-0.557858	0.0101044
ENSG00000047249	ATP6V1H	-0.549636	0.0103163
ENSG00000204634	TBC1D8	-0.63411	0.010802
ENSG00000196562	SULF2	-0.805587	0.0109318
ENSG00000196663	TECPR2	-1.60113	0.0115255
ENSG00000156050	FAM161B	-1.20924	0.0119305
ENSG00000196437	ZNF569	-0.946897	0.0121961
ENSG00000155545	MIER3	-1.27769	0.0124778
ENSG00000204388	HSPA1B	-0.691106	0.0130691
ENSG00000170144	HNRNPA3	-0.954371	0.0134848
ENSG00000119638	NEK9	-0.810928	0.0137193
ENSG00000175197	DDIT3	-0.518821	0.0138107
ENSG00000172159	FRMD3	-1.32995	0.0142953
ENSG00000182218	HHIPL1	-1.30546	0.0149826
ENSG00000116954	RRAGC	-0.942424	0.0150442
ENSG00000119537	KDSR	-0.441627	0.0151181
ENSG00000104332	SFRP1	-0.685838	0.0154128
ENSG00000106266	SNX8	-0.636838	0.0159087
ENSG00000156804	FBXO32	-0.44944	0.015994
ENSG00000205765	RIMOC1	-0.84886	0.0173355
ENSG00000134324	LPIN1	-0.616653	0.0176242
ENSG00000174839	DENND6A	-1.32027	0.0177542
ENSG00000106780	MEGF9	-1.58585	0.0181506
ENSG00000150594	ADRA2A	-1.60254	0.0183422
ENSG00000198417	MT1F	-1.48656	0.0191451
ENSG00000102572	STK24	-0.737556	0.0199182
ENSG00000168298	H1-4	-1.13418	0.0207136
ENSG00000100292	HMOX1	-0.691213	0.0207444
ENSG00000018625	ATP1A2	-2.83851	0.0211085
ENSG00000272106		-1.31985	0.0215271
ENSG00000108639	SYNGR2	-1.09397	0.0215788
ENSG00000298336	SLC22a23-AS	-1.26165	0.0221473
ENSG00000115942	ORC2	-0.961445	0.0224236
ENSG00000110851	PRDM4	-0.660863	0.0230242
ENSG00000114779	ABHD14B	-0.459873	0.0235424
ENSG00000108771	DHX58	-1.52056	0.023547
ENSG00000080839	RBL1	-1.32377	0.0237098
ENSG00000116830	TTF2	-1.08961	0.0237549
ENSG00000144749	LRIG1	-1.1407	0.0239786
ENSG00000082458	DLG3	-1.04167	0.0241978
ENSG00000133048	CHI3L1	-0.721535	0.0242724
ENSG00000114107	CEP70	-0.789803	0.0255965
ENSG00000107562	CXCL12	-0.821531	0.0264703
ENSG00000133597	ADCK2	-0.69602	0.0265539
ENSG00000013583	HEBP1	-0.391854	0.0266618
ENSG00000185220	PGBD2	-1.18545	0.0269379
ENSG00000116731	PRDM2	-0.896225	0.0269442
ENSG00000125347	IRF1	-0.651698	0.027046
ENSG00000185338	SOCS1	-1.28765	0.0271902
ENSG00000163590	PPM1L	-1.64573	0.0273204
ENSG00000145375	AFG2A	-1.54064	0.0278349
ENSG00000137404	NRM	-0.859854	0.0278857
ENSG00000132639	SNAP25	-1.04259	0.0279089
ENSG00000213722	DDAH2	-0.451848	0.0279261
ENSG00000136451	VEZF1	-0.64539	0.0279345
ENSG00000183665	TRMT12	-0.962491	0.0289064
ENSG00000010295	IFFO1	-0.533501	0.0295855
ENSG00000177683	THAP5	-0.957823	0.029731
ENSG00000197380	DACT3	-1.31282	0.031192
ENSG00000165914	TTC7B	-0.847746	0.031273
ENSG00000151376	ME3	-0.988132	0.031526
ENSG00000164494	PDSS2	-0.630286	0.0320287
ENSG00000117174	ZNHIT6	-0.821666	0.0320444
ENSG00000204673	AKT1S1	-0.529081	0.032112
ENSG00000065534	MYLK	-0.432994	0.0325333
ENSG00000142444	TIMM29	-0.738923	0.032919
ENSG00000133321	PLAAT4	-1.1163	0.0330147
ENSG00000142528	ZNF473	-0.898384	0.03325
ENSG00000089682	RBM41	-0.69843	0.0335075
ENSG00000108219	TSPAN14	-0.472601	0.0335169
ENSG00000184992	BRI3BP	-1.01042	0.033671
ENSG00000159251	ACTC1	-0.697604	0.034021
ENSG00000125971	DYNLRB1	-0.734392	0.034653
ENSG00000249628	LINC00942	-1.2311	0.0346613
ENSG00000118407	FILIP1	-1.52717	0.0349327
ENSG00000165197	VEGFD	-0.532604	0.0350423
ENSG00000188997	KCTD21	-1.22263	0.0368226
ENSG00000211584	SLC48A1	-0.53543	0.0372269
ENSG00000157837	SPPL3	-0.503658	0.0375129
ENSG00000136040	PLXNC1	-1.74464	0.0377114
ENSG00000211445	GPX3	-0.429761	0.0380184
ENSG00000151240	DIP2C	-0.654645	0.0380732
ENSG00000025770	NCAPH2	-0.501558	0.038199
ENSG00000173456	RNF26	-0.526213	0.0383878
ENSG00000271614	ATP2B1-AS1	-0.82546	0.0385807
ENSG00000164010	ERMAP	-1.03385	0.038867
ENSG00000165912	PACSIN3	-0.603778	0.039016
ENSG00000177606	JUN	-0.625392	0.0399539
ENSG00000171055	FEZ2	-0.609698	0.0404849
ENSG00000162437	RAVER2	-2.00736	0.0404959
ENSG00000070501	POLB	-0.838497	0.0420221
ENSG00000088899	LZTS3	-0.862457	0.0423665
ENSG00000163947	ARHGEF3	-0.952278	0.0427871
ENSG00000197766	CFD	-0.433338	0.042814
ENSG00000119684	MLH3	-0.72223	0.0429012
ENSG00000116095	PLEKHA3	-0.632584	0.0433009
ENSG00000197355	UAP1L1	-0.709832	0.0440104
ENSG00000145675	PIK3R1	-0.683846	0.044269
ENSG00000138246	DNAJC13	-0.842124	0.0447283
ENSG00000173511	VEGFB	-0.780713	0.0448225
ENSG00000101236	RNF24	-0.462607	0.0448401
ENSG00000105656	ELL	-0.769389	0.0458153
ENSG00000120049	KCNIP2	-1.68859	0.0462979
ENSG00000110583	NAA40	-1.00138	0.0463587
ENSG00000146416	AIG1	-0.501245	0.0466749
ENSG00000204161	TMEM273	-1.91434	0.0467052
ENSG00000119402	FBXW2	-0.483998	0.0468713
ENSG00000182648	RNF32-DT	-0.894287	0.0473797
ENSG00000241316	SUCLG2-DT	-0.890669	0.0480223
ENSG00000135835	KIAA1614	-1.38904	0.0481513
ENSG00000141446	ESCO1	-0.764507	0.0487952
ENSG00000184584	STING1	-0.635171	0.0492934
ENSG00000167588	GPD1	-0.674574	0.0496407
Supp. Table 1. Complete list of DEG significantly downregulated genes (p-value <0.05) on the model of skeletal muscle stroma subjected to space exposome exposure (n=3) compared to the ground control (n=3) in logFC.
Non-protein-coding DEG are highlight in italic.* = FDR < 0.05.
