# Supplementary material for: Transcriptomic Profiling of Muscle-Derived Stromal and Adipocytes Cells Exposed to Suborbital Microgravity
Source: Research Square preprint supplement (doi:10.21203/rs.3.rs-7745208/v1), 2025-12-10
Supplement: Supplementary file 6 [file f64a5640b73dcc1bf98e464f.xlsx]

## Sheet: UPREGULATED DEG
ensembl	Symbol	LogFC	p-Value	FDR < 0.05
ENSG00000187957	DNER	5.67329	5.02733e-11	*
ENSG00000164442	CITED2	1.15891	3.63393e-08	*
ENSG00000130255	RPL36	0.874249	6.42324e-08	*
ENSG00000183011	NAA38	1.00154	1.09177e-06	*
ENSG00000130332	LSM7	0.8313	1.18317e-06	*
ENSG00000136942	RPL35	0.73093	3.04099e-06	*
ENSG00000149968	MMP3	3.38585	3.74213e-06	*
ENSG00000105640	RPL18A	0.729163	7.60794e-06	*
ENSG00000179271	GADD45GIP1	0.915198	8.89317e-06	*
ENSG00000160214	RRP1	0.922788	1.0449e-05	*
ENSG00000063177	RPL18	0.598225	1.38672e-05	*
ENSG00000162244	RPL29	0.633735	1.42551e-05	*
ENSG00000174917	MICOS13	0.85497	1.44849e-05	*
ENSG00000174886	NDUFA11	0.733184	1.53089e-05	*
ENSG00000134809	TIMM10	0.725622	1.57912e-05	*
ENSG00000149806	FAU	0.629636	1.68019e-05	*
ENSG00000120913	PDLIM2	0.708787	1.68265e-05	*
ENSG00000167526	RPL13	0.613785	2.00972e-05	*
ENSG00000140988	RPS2	0.613537	2.20671e-05	*
ENSG00000135940	COX5B	0.702357	2.21442e-05	*
ENSG00000170889	RPS9	0.617274	2.21619e-05	*
ENSG00000125652	ALKBH7	0.846988	2.81383e-05	*
ENSG00000189171	S100A13	0.750313	3.04067e-05	*
ENSG00000233276	GPX1	0.784728	3.28824e-05	*
ENSG00000099795	NDUFB7	0.958489	3.30354e-05	*
ENSG00000127540	UQCR11	0.633983	3.84655e-05	*
ENSG00000183617	MRPL54	0.826523	3.84758e-05	*
ENSG00000188186	LAMTOR4	0.764145	4.37738e-05	*
ENSG00000172590	MRPL52	0.782697	4.47231e-05	*
ENSG00000187051	RPS19BP1	0.721367	6.07909e-05	*
ENSG00000277972	CISD3	0.788431	6.4643e-05	*
ENSG00000125970	RALY	0.606714	7.0214e-05	*
ENSG00000163815	CLEC3B	1.01144	7.85606e-05	*
ENSG00000172366	MCRIP2	1.17006	7.88197e-05	*
ENSG00000100097	LGALS1	0.690246	8.1486e-05	*
ENSG00000197728	RPS26	0.587051	8.16069e-05	*
ENSG00000128524	ATP6V1F	0.604803	9.27196e-05	*
ENSG00000177600	RPLP2	0.702835	9.52966e-05	*
ENSG00000244187	TMEM141	0.80331	9.55339e-05	*
ENSG00000141552	ANAPC11	0.688947	9.77863e-05	*
ENSG00000178449	COX14	0.66752	0.000101691	*
ENSG00000105699	LSR	1.58036	0.000110651	*
ENSG00000111678	C12orf57	0.821615	0.000112046	*
ENSG00000198937	CCDC167	0.772223	0.000113299	*
ENSG00000130707	ASS1	0.510588	0.000115398	*
ENSG00000106089	STX1A	1.46084	0.000118146	*
ENSG00000197766	CFD	0.760307	0.000122214	*
ENSG00000164587	RPS14	0.563574	0.000135065	*
ENSG00000152082	MZT2B	0.841991	0.000135942	*
ENSG00000231500	RPS18	0.575801	0.000135982	*
ENSG00000225663	MCRIP1	0.676431	0.000139432	*
ENSG00000105372	RPS19	0.60521	0.000140864	*
ENSG00000010438	PRSS3	1.6039	0.000141271	*
ENSG00000177700	POLR2L	0.803201	0.000153564	*
ENSG00000115268	RPS15	0.706497	0.00016544	*
ENSG00000267280	TBX2-AS1	1.78233	0.00016783	*
ENSG00000126432	PRDX5	0.604209	0.000171519	*
ENSG00000177954	RPS27	0.692782	0.000180165	*
ENSG00000106400	ZNHIT1	0.550125	0.000184409	*
ENSG00000100319	ZMAT5	0.896049	0.00018594	*
ENSG00000084207	GSTP1	0.733463	0.000186615	*
ENSG00000172922	RNASEH2C	0.772117	0.00018882	*
ENSG00000119632	IFI27L2	0.756138	0.000190719	*
ENSG00000105193	RPS16	0.528109	0.000215775	*
ENSG00000173272	MZT2A	0.850824	0.000218573	*
ENSG00000103363	ELOB	0.825293	0.000224736	*
ENSG00000083845	RPS5	0.557236	0.000241161	*
ENSG00000177556	ATOX1	0.548833	0.00024698	*
ENSG00000171307	ZDHHC16	0.711518	0.000254814	*
ENSG00000171223	JUNB	0.923998	0.000270066	*
ENSG00000100300	TSPO	0.754662	0.000271174	*
ENSG00000242299	RPS18P5	0.74501	0.000271192	*
ENSG00000125743	SNRPD2	0.582558	0.000279356	*
ENSG00000198832	SELENOM	0.717563	0.000287643	*
ENSG00000233927	RPS28	0.704569	0.000289608	*
ENSG00000128185	DGCR6L	0.74379	0.000298704	*
ENSG00000137818	RPLP1	0.568521	0.000321401	*
ENSG00000122971	ACADS	0.958064	0.000324554	*
ENSG00000142534	RPS11	0.505132	0.000329777	*
ENSG00000172809	RPL38	0.616063	0.000336019	*
ENSG00000197956	S100A6	0.528434	0.000338489	*
ENSG00000167515	TRAPPC2L	0.624823	0.000353629	*
ENSG00000161677	JOSD2	0.904923	0.000355313	*
ENSG00000175602	CCDC85B	0.998916	0.000367824	*
ENSG00000004059	ARF5	0.612501	0.000369915	*
ENSG00000142541	RPL13A	0.502958	0.000372535	*
ENSG00000125995	ROMO1	0.872311	0.000382608	*
ENSG00000166441	RPL27A	0.515105	0.000395275	*
ENSG00000206503	HLA-A	0.724142	0.000404158	*
ENSG00000224877	NDUFAF8	0.598733	0.000430738	*
ENSG00000197582		1.27176	0.0004369	*
ENSG00000164405	UQCRQ	0.567533	0.000463567	*
ENSG00000111667	USP5	0.610131	0.000466215	*
ENSG00000090013	BLVRB	0.852829	0.000476432	*
ENSG00000167645	YIF1B	0.712822	0.000491504	*
ENSG00000115286	NDUFS7	0.730937	0.000514129	*
ENSG00000183207	RUVBL2	0.649352	0.000518164	*
ENSG00000175550	DRAP1	0.60608	0.000546288	*
ENSG00000117410	ATP6V0B	0.646878	0.000548309	*
ENSG00000204394	VARS1	0.655724	0.000551912	*
ENSG00000132329	RAMP1	0.915157	0.000560645	*
ENSG00000173457	PPP1R14B	0.566641	0.00058629	*
ENSG00000228300	FAM174C	0.758546	0.00060278	*
ENSG00000189129	PLAC9	0.780162	0.000605578	*
ENSG00000034510	TMSB10	0.531524	0.000624606	*
ENSG00000144713	RPL32	0.509654	0.000632323	*
ENSG00000164062	APEH	0.555637	0.000641385	*
ENSG00000170906	NDUFA3	0.765288	0.000642975	*
ENSG00000131469	RPL27	0.520075	0.000662364	*
ENSG00000277791	PSMB3	0.547422	0.000667284	*
ENSG00000182154	MRPL41	0.883442	0.000677378	*
ENSG00000172336	POP7	0.683751	0.00070969	*
ENSG00000287673		2.66973	0.000716577	*
ENSG00000147403	RPL10	0.495758	0.000750581	*
ENSG00000160888	IER2	0.947674	0.000768056
ENSG00000170345	FOS	1.02666	0.000810621
ENSG00000104435	STMN2	1.56736	0.000834442
ENSG00000181817	LSM10	0.570834	0.000880048
ENSG00000171858	RPS21	0.638941	0.000884876
ENSG00000197530	MIB2	0.966236	0.000886824
ENSG00000091640	SPAG7	0.497606	0.000916004
ENSG00000054148	PHPT1	0.758414	0.000927816
ENSG00000161513	FDXR	0.770867	0.000964182
ENSG00000213465	ARL2	0.666835	0.000968777
ENSG00000006282	SPATA20	0.606885	0.00104378
ENSG00000051523	CYBA	0.741778	0.00106859
ENSG00000145214	DGKQ	1.08181	0.00108702
ENSG00000241468	ATP5MF	0.515034	0.00111253
ENSG00000095906	NUBP2	0.719641	0.00113297
ENSG00000243449	NICOL1	1.05184	0.00113842
ENSG00000166165	CKB	0.627768	0.00114862
ENSG00000137106	GRHPR	0.478385	0.0011543
ENSG00000165233	CARD19	0.638646	0.00115763
ENSG00000158716	DUSP23	0.682609	0.001167
ENSG00000124172	ATP5F1E	0.507439	0.00119127
ENSG00000213722	DDAH2	0.606557	0.00121853
ENSG00000186010	NDUFA13	0.734055	0.00125327
ENSG00000133800	LYVE1	4.35487	0.00126296
ENSG00000176340	COX8A	0.545352	0.00129478
ENSG00000170473	PYM1	0.742458	0.00132161
ENSG00000197982	C1orf122	0.554284	0.00133042
ENSG00000177106	EPS8L2	0.852367	0.00133215
ENSG00000169020	ATP5ME	0.634833	0.00134475
ENSG00000135441	BLOC1S1	0.676869	0.00134739
ENSG00000153406	NMRAL1	0.628233	0.00137106
ENSG00000184232	OAF	0.671657	0.00139993
ENSG00000161016	RPL8	0.6051	0.00142045
ENSG00000167136	ENDOG	1.03064	0.00145016
ENSG00000112695	COX7A2	0.479221	0.00152112
ENSG00000132661	NXT1	0.727912	0.00154356
ENSG00000171222	SCAND1	0.657745	0.00159889
ENSG00000213442	RPL18AP3	0.612617	0.00159996
ENSG00000173267	SNCG	1.52094	0.00161671
ENSG00000105258	POLR2I	0.753497	0.00164449
ENSG00000180879	SSR4	0.570625	0.00165856
ENSG00000179115	FARSA	0.606658	0.00167494
ENSG00000107223	EDF1	0.515824	0.00169948
ENSG00000123144	TRIR	0.537297	0.00171141
ENSG00000184281	TSSC4	0.846544	0.00173809
ENSG00000167468	GPX4	0.53492	0.00174066
ENSG00000168273	UQCC5	0.63154	0.0017428
ENSG00000198258	UBL5	0.458025	0.00179499
ENSG00000131143	COX4I1	0.473682	0.00183444
ENSG00000090266	NDUFB2	0.589855	0.00188378
ENSG00000012211	PRICKLE3	1.36252	0.00188777
ENSG00000130811	EIF3G	0.517667	0.0019089
ENSG00000105700	KXD1	0.478098	0.00190936
ENSG00000149923	PPP4C	0.567873	0.00193075
ENSG00000132004	FBXW9	1.17202	0.00194375
ENSG00000105404	RABAC1	0.71877	0.00195546
ENSG00000127184	COX7C	0.475121	0.00199103
ENSG00000141696	P3H4	0.51759	0.00199968
ENSG00000175701	MTLN	0.649316	0.00201776
ENSG00000128965	CHAC1	1.33162	0.00216995
ENSG00000134668	SPOCD1	0.712292	0.00218773
ENSG00000011132	APBA3	0.855025	0.00223349
ENSG00000184260	H2AC20	1.46494	0.0023149
ENSG00000168061	SAC3D1	0.893575	0.00231922
ENSG00000137288	UQCC2	0.553251	0.00236837
ENSG00000118894	EEF2KMT	0.810922	0.0023859
ENSG00000197756	RPL37A	0.557344	0.00241063
ENSG00000141971	MVB12A	0.607319	0.00243764
ENSG00000130731	METTL26	0.722171	0.00246023
ENSG00000126267	COX6B1	0.470836	0.00254
ENSG00000141349	G6PC3	0.587361	0.0025742
ENSG00000242372	EIF6	0.494944	0.00258066
ENSG00000072506	HSD17B10	0.489465	0.00258571
ENSG00000102871	TRADD	0.834392	0.00259974
ENSG00000140365	COMMD4	0.589889	0.00260274
ENSG00000188229	TUBB4B	0.586113	0.00260413
ENSG00000074842	MYDGF	0.563578	0.00263385
ENSG00000165283	STOML2	0.444446	0.00264039
ENSG00000148803	FUOM	0.954524	0.00273139
ENSG00000104529	EEF1D	0.48553	0.00276686
ENSG00000125611	CHCHD5	0.634234	0.00279023
ENSG00000064205	CCN5	0.532806	0.00285035
ENSG00000167733	HSD11B1L	0.801794	0.00293662
ENSG00000149273	RPS3	0.427874	0.00294826
ENSG00000100926	TM9SF1	0.916711	0.00294913
ENSG00000100142	POLR2F	0.529533	0.00297869
ENSG00000214253	FIS1	0.608618	0.00298196
ENSG00000123933	MXD4	0.559807	0.0029836
ENSG00000130311	DDA1	0.589255	0.00302781
ENSG00000104907	TRMT1	0.745867	0.00303512
ENSG00000119559	C19orf25	0.694852	0.00305104
ENSG00000288649	ACTL10	2.10294	0.0031184
ENSG00000180992	MRPL14	0.5253	0.00316318
ENSG00000143774	GUK1	0.563392	0.00317667
ENSG00000109519	GRPEL1	0.44278	0.00318119
ENSG00000101220	ADISSP	0.547799	0.00319737
ENSG00000159685	CHCHD6	0.906892	0.00321573
ENSG00000161281	COX7A1	0.790314	0.00322978
ENSG00000173156	RHOD	0.784061	0.00325167
ENSG00000215375	MYL5	0.706664	0.00328093
ENSG00000130511	SSBP4	0.584905	0.00328517
ENSG00000181924	COA4	0.467515	0.00334668
ENSG00000150779	TIMM8B	0.553592	0.00345737
ENSG00000099624	ATP5F1D	0.596225	0.00352584
ENSG00000170430	MGMT	0.651955	0.00361926
ENSG00000175573	C11orf68	0.532683	0.00364222
ENSG00000167617	CDC42EP5	0.614904	0.00364284
ENSG00000167965	MLST8	0.550102	0.00365708
ENSG00000204237	OXLD1	0.728858	0.00374115
ENSG00000185043	CIB1	0.546913	0.00377013
ENSG00000196683	TOMM7	0.475822	0.00382257
ENSG00000106153	CHCHD2	0.376338	0.00389216
ENSG00000129235	TXNDC17	0.399143	0.00392104
ENSG00000117691	NENF	0.547953	0.00392324
ENSG00000130748	TMEM160	0.843458	0.00394245
ENSG00000198356	GET3	0.488334	0.00399734
ENSG00000126458	RRAS	0.600813	0.00403072
ENSG00000174547	MRPL11	0.511854	0.0040896
ENSG00000240342	RPS2P5	0.450304	0.00413149
ENSG00000203778	FAM229B	0.67115	0.00414152
ENSG00000112796	ENPP5	1.4927	0.00424506
ENSG00000105677	TMEM147	0.472113	0.00431275
ENSG00000130560	UBAC1	0.580047	0.00435733
ENSG00000229833	PET100	0.698813	0.0043687
ENSG00000128228	SDF2L1	0.958413	0.00437939
ENSG00000103266	STUB1	0.661477	0.00438458
ENSG00000162840		1.00563	0.00447067
ENSG00000169026	SLC49A3	1.07611	0.00449648
ENSG00000188487	INSC	1.56638	0.00451988
ENSG00000006015	REX1BD	0.783717	0.00459936
ENSG00000101997	CCDC22	0.762264	0.00464251
ENSG00000184990	SIVA1	0.630535	0.00469413
ENSG00000230777	RPS29P5	1.11845	0.00471554
ENSG00000156521	TYSND1	0.691739	0.00476816
ENSG00000102760	RGCC	0.743733	0.00477257
ENSG00000130751	NPAS1	1.38561	0.00484659
ENSG00000173221	GLRX	0.393228	0.00485813
ENSG00000128626	MRPS12	0.573144	0.00486204
ENSG00000154518	ATP5MC3	0.405067	0.00487403
ENSG00000125454	SLC25A19	1.11682	0.00492451
ENSG00000142686	C1orf216	0.538648	0.00497331
ENSG00000158747	NBL1	0.490884	0.00499009
ENSG00000269293	ZSCAN16-AS1	0.789756	0.00502096
ENSG00000147383	NSDHL	0.607575	0.00505214
ENSG00000133027	PEMT	0.64149	0.00508916
ENSG00000168894	RNF181	0.471592	0.00517961
ENSG00000071859	FAM50A	0.413947	0.00517986
ENSG00000103152	MPG	0.64324	0.00518426
ENSG00000136732	GYPC	0.63726	0.00524392
ENSG00000148926	ADM	0.491509	0.00525893
ENSG00000205138	SDHAF1	0.693937	0.0052629
ENSG00000103202	NME4	0.578056	0.00527768
ENSG00000158186	MRAS	0.645449	0.00531095
ENSG00000053501	USE1	0.556928	0.00535883
ENSG00000134825	TMEM258	0.442831	0.00537844
ENSG00000169976	SF3B5	0.44165	0.0053832
ENSG00000213445	SIPA1	0.780117	0.00543148
ENSG00000108107	RPL28	0.479991	0.00543406
ENSG00000103264	FBXO31	0.58711	0.00543726
ENSG00000243678	NME2	0.792644	0.00550663
ENSG00000168653	NDUFS5	0.46333	0.00552472
ENSG00000089157	RPLP0	0.415447	0.0055431
ENSG00000213741	RPS29	0.718217	0.00558206
ENSG00000129968	ABHD17A	0.741357	0.00560527
ENSG00000169696	ASPSCR1	0.708441	0.00563989
ENSG00000174307	PHLDA3	0.577451	0.00566322
ENSG00000171863	RPS7	0.431178	0.00569406
ENSG00000171421	MRPL36	0.541621	0.00580287
ENSG00000110717	NDUFS8	0.593662	0.00586128
ENSG00000163159	VPS72	0.557677	0.0058755
ENSG00000174775	HRAS	0.677422	0.00587569
ENSG00000125356	NDUFA1	0.457374	0.00589596
ENSG00000152464	RPP38	0.734942	0.00593748
ENSG00000099817	POLR2E	0.544609	0.00616962
ENSG00000141933	TPGS1	0.915696	0.00618277
ENSG00000115129	TP53I3	0.4881	0.0062176
ENSG00000106628	POLD2	0.538667	0.00624806
ENSG00000256269	HMBS	0.682152	0.0062686
ENSG00000173113	TRMT112	0.444338	0.00632794
ENSG00000147889	CDKN2A	0.580046	0.00636085
ENSG00000147123	NDUFB11	0.553148	0.00638186
ENSG00000170619	COMMD5	0.588416	0.00640869
ENSG00000145592	RPL37	0.552531	0.00660397
ENSG00000074071	MRPS34	0.547275	0.00661367
ENSG00000126062	TMEM115	0.531595	0.00664843
ENSG00000169738	DCXR	0.680277	0.00672419
ENSG00000163661	PTX3	0.563848	0.00676616
ENSG00000099385	BCL7C	0.565981	0.00686314
ENSG00000023330	ALAS1	0.458628	0.00690709
ENSG00000007520	TSR3	0.520373	0.00695304
ENSG00000002330	BAD	0.697574	0.00695778
ENSG00000173465	ZNRD2	0.666588	0.00702275
ENSG00000159884	CCDC107	0.968976	0.00702379
ENSG00000204498	NFKBIL1	0.730492	0.0070677
ENSG00000178498	DTX3	1.20085	0.00712022
ENSG00000166173	LARP6	0.376864	0.00713273
ENSG00000131188	PRR7	1.12583	0.00714765
ENSG00000138172	CALHM2	0.58102	0.00719533
ENSG00000114942	EEF1B2	0.420255	0.0072161
ENSG00000120129	DUSP1	0.668426	0.00723922
ENSG00000179085	DPM3	0.701736	0.00736022
ENSG00000172889	EGFL7	1.0421	0.0074438
ENSG00000139410	SDSL	0.761397	0.00745943
ENSG00000134905	CARS2	0.427955	0.00746414
ENSG00000229809	ZNF688	0.722479	0.00746452
ENSG00000105373	NOP53	0.45953	0.00748913
ENSG00000183828	NUDT14	0.616702	0.00749878
ENSG00000221821	C6orf226	0.86128	0.00753807
ENSG00000129355	CDKN2D	1.06311	0.00758669
ENSG00000168393	DTYMK	0.517235	0.00760577
ENSG00000143416	SELENBP1	0.448598	0.00761775
ENSG00000126768	TIMM17B	0.618905	0.0076679
ENSG00000100258	LMF2	0.502028	0.00771389
ENSG00000163170	BOLA3	0.596628	0.00774604
ENSG00000288044	DHRS1-AS	1.3063	0.00779065
ENSG00000185761	ADAMTSL5	1.2961	0.00781085
ENSG00000262814	MRPL12	0.748723	0.00788106
ENSG00000125965	GDF5	1.07336	0.00788135
ENSG00000181264	TLCD5	0.843042	0.00789681
ENSG00000184983	NDUFA6	0.436197	0.0079291
ENSG00000122140	MRPS2	0.582898	0.0079517
ENSG00000037897	METTL1	0.92573	0.0079531
ENSG00000182117	NOP10	0.394865	0.00808888
ENSG00000135617	PRADC1	0.660166	0.00815447
ENSG00000176845	METRNL	0.913322	0.00826938
ENSG00000228474	OST4	0.416716	0.00832252
ENSG00000157593	SLC35B2	0.448977	0.0083423
ENSG00000144488	ESPNL	1.22863	0.00849545
ENSG00000175854	SWI5	0.526182	0.00851946
ENSG00000100294	MCAT	0.798235	0.00863661
ENSG00000176597	B3GNT5	1.26106	0.00872923
ENSG00000101457	DNTTIP1	0.489151	0.00876784
ENSG00000145912	NHP2	0.499975	0.0088198
ENSG00000221869	CEBPD	0.46217	0.00887194
ENSG00000229117	RPL41	0.481291	0.00891814
ENSG00000197958	RPL12	0.450535	0.00892109
ENSG00000100417	PMM1	0.525226	0.00894977
ENSG00000167671	UBXN6	0.725931	0.00895678
ENSG00000188130	MAPK12	0.643684	0.00898567
ENSG00000120437	ACAT2	0.546003	0.00914792
ENSG00000088682	COQ9	0.478744	0.0091639
ENSG00000125912	NCLN	0.552845	0.00931967
ENSG00000093010	COMT	0.438067	0.00945214
ENSG00000136718	IMP4	0.534612	0.00959983
ENSG00000130203	APOE	0.727452	0.00964944
ENSG00000104886	PLEKHJ1	0.593012	0.00970864
ENSG00000131435	PDLIM4	0.580104	0.00978337
ENSG00000113119	TMCO6	0.979073	0.00986419
ENSG00000219928		0.92481	0.00995711
ENSG00000020256	ZFP64	0.717544	0.0100287
ENSG00000256940	PPP1R14B-AS1	1.28093	0.0100489
ENSG00000163481	RNF25	0.554302	0.01011
ENSG00000166337	TAF10	0.819812	0.0101442
ENSG00000105379	ETFB	0.531145	0.0101508
ENSG00000112667	DNPH1	0.683542	0.010223
ENSG00000108479	GALK1	0.814587	0.0104597
ENSG00000108106	UBE2S	0.735456	0.0104801
ENSG00000145494	NDUFS6	0.478731	0.0105745
ENSG00000196976	LAGE3	0.649559	0.0106102
ENSG00000242485	MRPL20	0.427242	0.0106744
ENSG00000130204	TOMM40	0.553732	0.0107631
ENSG00000175768	TOMM5	0.538664	0.010861
ENSG00000242802	AP5Z1	0.543894	0.0108682
ENSG00000160284	SPATC1L	0.620957	0.0109123
ENSG00000105618	PRPF31	0.557123	0.0109525
ENSG00000125835	SNRPB	0.431855	0.0110147
ENSG00000183751	TBL3	0.609883	0.0110976
ENSG00000092841	MYL6	0.362436	0.0111037
ENSG00000151093	OXSM	0.674543	0.0111749
ENSG00000286162		0.872146	0.0113891
ENSG00000181649	PHLDA2	0.821361	0.0114746
ENSG00000133265	HSPBP1	0.61868	0.0114916
ENSG00000099804	CDC34	0.605384	0.0114936
ENSG00000172725	CORO1B	0.503858	0.011513
ENSG00000126457	PRMT1	0.520728	0.0115754
ENSG00000175906	ARL4D	0.640587	0.0117478
ENSG00000187514	PTMA	0.320894	0.0117574
ENSG00000167792	NDUFV1	0.458875	0.0117858
ENSG00000187837	H1-2	0.657478	0.011812
ENSG00000198892	SHISA4	0.616554	0.0118235
ENSG00000169727	GPS1	0.460277	0.0118625
ENSG00000198931	APRT	0.524932	0.0118734
ENSG00000123159	GIPC1	0.500031	0.0119532
ENSG00000142507	PSMB6	0.466737	0.0119925
ENSG00000139428	MMAB	0.505466	0.0120347
ENSG00000137038	DMAC1	0.449568	0.0120531
ENSG00000136717	BIN1	0.402945	0.0120748
ENSG00000112306	RPS12	0.449847	0.0121965
ENSG00000109475	RPL34	0.405499	0.0122105
ENSG00000284194	SCO2	0.988084	0.012298
ENSG00000167112	TRUB2	0.547716	0.0123782
ENSG00000108298	RPL19	0.343775	0.0125721
ENSG00000155366	RHOC	0.397487	0.0126241
ENSG00000105552	BCAT2	0.550213	0.0126488
ENSG00000080189	SLC35C2	0.501631	0.0127625
ENSG00000166347	CYB5A	0.444347	0.0128265
ENSG00000042493	CAPG	0.464417	0.012849
ENSG00000147439	BIN3	0.554967	0.0128775
ENSG00000221983	UBA52	0.377415	0.0129088
ENSG00000166169	POLL	0.811571	0.0129127
ENSG00000172428	COPS9	0.462926	0.0129295
ENSG00000182774	RPS17	0.853127	0.0130183
ENSG00000128311	TST	0.896403	0.0130367
ENSG00000167130	DOLPP1	0.640488	0.0131249
ENSG00000106268	NUDT1	0.557203	0.0131562
ENSG00000103260	METRN	1.02517	0.0132573
ENSG00000130208	APOC1	0.522958	0.0132731
ENSG00000171159	BBLN	0.53825	0.0132825
ENSG00000257704	INAFM1	0.706418	0.0133882
ENSG00000184967	NOC4L	0.691629	0.0134109
ENSG00000162517	PEF1	0.415237	0.0134942
ENSG00000167779	IGFBP6	0.659196	0.0134946
ENSG00000119630	PGF	0.443437	0.013566
ENSG00000163528	CHCHD4	0.746729	0.0136096
ENSG00000087884	AAMDC	0.533041	0.013639
ENSG00000103381	CPPED1	0.502137	0.0137127
ENSG00000110057	UNC93B1	0.732263	0.0138533
ENSG00000146540	C7orf50	0.537359	0.0139047
ENSG00000091947	TMEM101	0.700028	0.0141372
ENSG00000107738	VSIR	0.873524	0.0141692
ENSG00000065357	DGKA	0.613175	0.0142015
ENSG00000135404	CD63	0.41831	0.0142269
ENSG00000157778	PSMG3	0.523672	0.0142538
ENSG00000017483	SLC38A5	1.41321	0.0143089
ENSG00000126391	FRMD8	0.615042	0.0143908
ENSG00000162910	MRPL55	0.613533	0.0144327
ENSG00000107816	LZTS2	0.600667	0.0144657
ENSG00000166595	CIAO2B	0.424659	0.0144919
ENSG00000110700	RPS13	0.396113	0.0145734
ENSG00000258920	FOXN3-AS1	0.914103	0.0146973
ENSG00000100138	SNU13	0.342122	0.0147515
ENSG00000165644	COMTD1	0.949474	0.0148251
ENSG00000158435	CNOT11	0.457605	0.0150905
ENSG00000072958	AP1M1	0.442207	0.0151134
ENSG00000179632	MAF1	0.471482	0.0151249
ENSG00000105197	TIMM50	0.488885	0.0151443
ENSG00000147804	SLC39A4	0.965794	0.0151826
ENSG00000145014	TMEM44	0.653348	0.0152228
ENSG00000121680	PEX16	0.592306	0.0152334
ENSG00000124343	XG	0.753874	0.0154645
ENSG00000183696	UPP1	0.470164	0.0155543
ENSG00000141378	PTRH2	0.454357	0.0155673
ENSG00000239306	RBM14	0.763955	0.0156476
ENSG00000103024	NME3	0.634873	0.0156514
ENSG00000126254	RBM42	0.561007	0.0156582
ENSG00000141741	MIEN1	0.418165	0.0157525
ENSG00000126934	MAP2K2	0.379952	0.015785
ENSG00000173992	CCS	0.570441	0.0158261
ENSG00000119777	TMEM214	0.346419	0.015877
ENSG00000146066	HIGD2A	0.356334	0.0164827
ENSG00000198858	R3HDM4	0.503294	0.0164847
ENSG00000143314	MRPL24	0.401304	0.0166506
ENSG00000142910	TINAGL1	0.937486	0.0168374
ENSG00000247596	TWF2	0.512546	0.0168458
ENSG00000198242	RPL23A	0.393149	0.016972
ENSG00000169230	PRELID1	0.459462	0.0169738
ENSG00000204308	RNF5	0.406025	0.0170111
ENSG00000240065	PSMB9	0.667571	0.0170126
ENSG00000154096	THY1	0.422896	0.0170281
ENSG00000068079	IFI35	0.565559	0.0170716
ENSG00000239672	NME1	0.359866	0.0170869
ENSG00000159199	ATP5MC1	0.374631	0.0171426
ENSG00000112651	MRPL2	0.594098	0.0171578
ENSG00000123136	DDX39A	0.446968	0.0171953
ENSG00000293495	C19orf48P	0.65633	0.0172229
ENSG00000183978	COA3	0.445819	0.0172509
ENSG00000148344	PTGES	0.502499	0.0172932
ENSG00000087077	TRIP6	0.511288	0.0173124
ENSG00000133243	BTBD2	1.6064	0.0173908
ENSG00000163931	TKT	0.408556	0.0174703
ENSG00000112514	CUTA	0.375728	0.0175182
ENSG00000105669	COPE	0.477728	0.0175184
ENSG00000131652	THOC6	0.713975	0.0175934
ENSG00000149925	ALDOA	0.565348	0.0176223
ENSG00000070423	RNF126	0.590571	0.0177583
ENSG00000105223	PLD3	0.44189	0.017775
ENSG00000130313	PGLS	0.498612	0.0177933
ENSG00000115325	DOK1	0.576185	0.0178733
ENSG00000179364	PACS2	0.665317	0.0180673
ENSG00000161395	PGAP3	0.672803	0.0181061
ENSG00000189077	TMEM120A	0.594659	0.0181318
ENSG00000246705	H2AJ	0.765946	0.0181497
ENSG00000215305	VPS16	0.484802	0.0182229
ENSG00000127952	STYXL1	0.435472	0.0182317
ENSG00000196843	ARID5A	0.776543	0.018438
ENSG00000222032	LOC728009	2.81598	0.0184409
ENSG00000205155	PSENEN	0.50055	0.0184574
ENSG00000188486	H2AX	0.745217	0.0187181
ENSG00000175416	CLTB	0.493385	0.0189491
ENSG00000124562	SNRPC	0.429904	0.0191905
ENSG00000014216	CAPN1	0.402241	0.0192194
ENSG00000134248	LAMTOR5	0.317997	0.0192341
ENSG00000171443	ZNF524	0.659185	0.0192346
ENSG00000142544	CTU1	0.96719	0.0193693
ENSG00000170291	ELP5	0.41188	0.0193816
ENSG00000119408	NEK6	0.415047	0.0193967
ENSG00000159335	PTMS	0.351082	0.0195075
ENSG00000006042	TMEM98	0.343525	0.0195438
ENSG00000053371	AKR7A2	0.352227	0.0195584
ENSG00000100577	GSTZ1	0.72677	0.0195906
ENSG00000141295	SCRN2	0.607397	0.0196665
ENSG00000064490	RFXANK	0.492122	0.0196811
ENSG00000167123	CERCAM	0.413202	0.0197115
ENSG00000078902	TOLLIP	0.46705	0.0197485
ENSG00000248098	BCKDHA	1.12742	0.0197883
ENSG00000213619	NDUFS3	0.339306	0.0198362
ENSG00000214530	STARD10	0.78286	0.0198494
ENSG00000141959	PFKL	0.432815	0.020002
ENSG00000205364	MT1M	0.828466	0.0200315
ENSG00000258429	PDF	1.12735	0.0200832
ENSG00000172893	DHCR7	0.511095	0.0201304
ENSG00000173660	UQCRH	0.363264	0.0201385
ENSG00000117318	ID3	0.586011	0.0202778
ENSG00000158792	SPATA2L	0.917148	0.0204378
ENSG00000160209	PDXK	0.372176	0.0205235
ENSG00000197021	EOLA2	0.571136	0.0205911
ENSG00000108963	DPH1	0.508843	0.0206357
ENSG00000178952	TUFM	0.336252	0.0206534
ENSG00000102030	NAA10	0.419569	0.0206954
ENSG00000081760	AACS	0.487356	0.0207018
ENSG00000106803	SEC61B	0.376868	0.0209199
ENSG00000148334	PTGES2	0.674683	0.0209797
ENSG00000154102	C16orf74	0.846583	0.021019
ENSG00000111775	COX6A1	0.399137	0.0210248
ENSG00000008988	RPS20	0.369087	0.021113
ENSG00000105518	TMEM205	0.520229	0.0212128
ENSG00000169972	PUSL1	0.63884	0.0212598
ENSG00000184371	CSF1	0.445311	0.021281
ENSG00000164081	TEX264	0.575948	0.0212961
ENSG00000059377	TBXAS1	1.266	0.0213663
ENSG00000189043	NDUFA4	0.377055	0.0214868
ENSG00000124733	MEA1	0.394757	0.0216452
ENSG00000214063	TSPAN4	0.530416	0.021706
ENSG00000183963	SMTN	0.527939	0.021724
ENSG00000131446	MGAT1	0.43498	0.021778
ENSG00000122694	GLIPR2	0.331542	0.0218002
ENSG00000156482	RPL30	0.443157	0.0218437
ENSG00000140264	SERF2	0.474959	0.0218907
ENSG00000179950	PUF60	0.472136	0.0220718
ENSG00000142552	RCN3	0.510521	0.0221273
ENSG00000182199	SHMT2	0.355952	0.0221298
ENSG00000025434	NR1H3	0.451863	0.0224111
ENSG00000184216	IRAK1	0.450145	0.0225368
ENSG00000182899	RPL35A	0.369811	0.0226841
ENSG00000099800	TIMM13	0.560049	0.0227304
ENSG00000183010	PYCR1	0.574414	0.0228141
ENSG00000104522	GFUS	0.489113	0.0228301
ENSG00000165724	ZMYND19	0.522449	0.0228445
ENSG00000169689	CENPX	0.603436	0.0228721
ENSG00000215030	RPL13P12	0.446676	0.0229382
ENSG00000105364	MRPL4	0.521073	0.0229509
ENSG00000051128	HOMER3	0.560691	0.022989
ENSG00000101940	WDR13	0.470119	0.0230116
ENSG00000128335	APOL2	0.478461	0.0231322
ENSG00000132386	SERPINF1	0.30851	0.0232056
ENSG00000143554	SLC27A3	0.502904	0.0234003
ENSG00000172775	PSME3IP1	0.479311	0.0234291
ENSG00000165886	UBTD1	0.570395	0.0235143
ENSG00000063241	ISOC2	0.508447	0.0235344
ENSG00000179242	CDH4	2.19715	0.0236163
ENSG00000130165	ELOF1	0.452692	0.0236414
ENSG00000177606	JUN	0.62596	0.0236498
ENSG00000171522	PTGER4	0.681638	0.0238319
ENSG00000196154	S100A4	0.393251	0.023918
ENSG00000204315	FKBPL	1.09942	0.0241024
ENSG00000179091	CYC1	0.492584	0.0241452
ENSG00000204592	HLA-E	0.393131	0.02423
ENSG00000015475	BID	0.38526	0.0242776
ENSG00000160783	PMF1	0.554795	0.0242907
ENSG00000149761	NUDT22	0.702498	0.0244374
ENSG00000118181	RPS25	0.468624	0.0244608
ENSG00000135778	NTPCR	0.451621	0.0246398
ENSG00000168679	SLC16A4	1.42166	0.0247964
ENSG00000197070	ARRDC1	0.710709	0.0249745
ENSG00000184508	HDDC3	0.75919	0.0250564
ENSG00000168899	VAMP5	0.482156	0.0252512
ENSG00000161091	MFSD12	0.620318	0.0253485
ENSG00000132507	EIF5A	0.313537	0.0254107
ENSG00000105617	LENG1	0.831412	0.0254139
ENSG00000230202	RPL29P4	0.554148	0.0254683
ENSG00000108828	VAT1	0.293055	0.0254721
ENSG00000130522	JUND	1.4474	0.0254965
ENSG00000164967	RPP25L	0.618019	0.0256248
ENSG00000125877	ITPA	0.407818	0.0256548
ENSG00000111321	LTBR	0.422156	0.0256572
ENSG00000244038	DDOST	0.313467	0.0256665
ENSG00000175575	PAAF1	0.450384	0.0257609
ENSG00000123975	CKS2	0.607164	0.0257738
ENSG00000141985	SH3GL1	0.502905	0.0258099
ENSG00000163682	RPL9	0.35075	0.0258615
ENSG00000105254	TBCB	0.401257	0.0259147
ENSG00000196756	SNHG17	0.648144	0.0260561
ENSG00000215021	PHB2	0.325891	0.0260745
ENSG00000168569	TMEM223	0.540309	0.0260773
ENSG00000115204	MPV17	0.368756	0.0260811
ENSG00000078808	SDF4	0.471155	0.0262267
ENSG00000132423	COQ3	0.783286	0.0262419
ENSG00000156411	ATP5MJ	0.35423	0.0264322
ENSG00000147813	NAPRT	0.611267	0.0265172
ENSG00000104979	C19orf53	0.459859	0.0267532
ENSG00000125037	EMC3	0.37567	0.0268403
ENSG00000274523	RCC1L	0.436978	0.0268608
ENSG00000214026	MRPL23	0.94032	0.0269206
ENSG00000158042	MRPL17	0.392193	0.026922
ENSG00000100360	IFT27	0.560299	0.0269742
ENSG00000168101	NUDT16L1	0.6371	0.0269856
ENSG00000185803	SLC52A2	0.592914	0.0270913
ENSG00000008283	CYB561	0.577151	0.0271647
ENSG00000167969	ECI1	0.486917	0.0273002
ENSG00000109736	MFSD10	0.422973	0.0273804
ENSG00000266472	MRPS21	0.314057	0.0278598
ENSG00000196453	ZNF777	1.56045	0.0279544
ENSG00000174851	YIF1A	0.445642	0.027988
ENSG00000178980	SELENOW	0.338865	0.0280232
ENSG00000166387	PPFIBP2	0.593416	0.0280907
ENSG00000089248	ERP29	0.314164	0.0283655
ENSG00000113569	NUP155	0.737154	0.0284975
ENSG00000106211	HSPB1	0.524165	0.0285158
ENSG00000114767	RRP9	0.645567	0.0285307
ENSG00000143575	HAX1	0.309556	0.0285885
ENSG00000134684	YARS1	0.329419	0.0286042
ENSG00000026559	KCNG1	0.692211	0.0287156
ENSG00000113758	DBN1	0.423561	0.0287992
ENSG00000160087	UBE2J2	0.416836	0.0288673
ENSG00000196465	MYL6B	0.427542	0.0289501
ENSG00000124614	RPS10	0.540019	0.0289642
ENSG00000143977	SNRPG	0.333756	0.0290193
ENSG00000104856	RELB	0.850852	0.0293063
ENSG00000231389	HLA-DPA1	1.58999	0.0293311
ENSG00000131495	NDUFA2	0.413135	0.029335
ENSG00000233016	SNHG7	0.784395	0.0293443
ENSG00000131408	NR1H2	0.47821	0.0294111
ENSG00000247516	MIR4458HG	0.488062	0.0295807
ENSG00000116670	MAD2L2	0.4689	0.0295812
ENSG00000188643	S100A16	0.385561	0.0296025
ENSG00000105447	GRWD1	0.49587	0.0296455
ENSG00000005075	POLR2J	0.504111	0.0296885
ENSG00000160014	CALM3	0.361257	0.0298592
ENSG00000175866	BAIAP2	0.701225	0.0298735
ENSG00000111652	COPS7A	0.312764	0.0300299
ENSG00000130005	GAMT	0.632439	0.0301608
ENSG00000100906	NFKBIA	0.408804	0.0302836
ENSG00000169429	CXCL8	0.758005	0.0303023
ENSG00000165912	PACSIN3	0.57092	0.0303315
ENSG00000204568	MRPS18B	0.365002	0.030367
ENSG00000130733	YIPF2	0.596314	0.0303824
ENSG00000114391	RPL24	0.368742	0.0304168
ENSG00000130164	LDLR	0.511573	0.0304314
ENSG00000127824	TUBA4A	0.450517	0.0304662
ENSG00000198585	NUDT16	0.456695	0.0304737
ENSG00000130725	UBE2M	0.510791	0.0305802
ENSG00000126903	SLC10A3	0.42389	0.0306743
ENSG00000171148	TADA3	0.408674	0.0307449
ENSG00000172270	BSG	0.480774	0.0307915
ENSG00000172531	PPP1CA	0.414731	0.0309303
ENSG00000164182	NDUFAF2	0.457152	0.0309776
ENSG00000110011	DNAJC4	0.516796	0.031097
ENSG00000175221	MED16	0.6824	0.0313574
ENSG00000227081	RPS27P3	0.562115	0.0313822
ENSG00000110711	AIP	0.479631	0.0313952
ENSG00000115661	STK16	0.617456	0.0315278
ENSG00000124357	NAGK	0.418069	0.0315283
ENSG00000114648	KLHL18	0.79126	0.0315635
ENSG00000164896	FASTK	0.443536	0.0316159
ENSG00000181991	MRPS11	0.466216	0.0316721
ENSG00000076924	XAB2	0.684649	0.0317072
ENSG00000131043	AAR2	0.550945	0.0317373
ENSG00000287115	LINC02993	0.787473	0.031884
ENSG00000120509	PDZD11	0.326089	0.0319558
ENSG00000100804	PSMB5	0.327381	0.0319805
ENSG00000230897	RPS18P12	0.490766	0.0320131
ENSG00000181029	TRAPPC5	0.8824	0.0320622
ENSG00000177156	TALDO1	0.31645	0.0322544
ENSG00000178467	P4HTM	0.605049	0.0322911
ENSG00000157637	SLC38A10	0.487486	0.0323982
ENSG00000136840	ST6GALNAC4	0.457822	0.0324058
ENSG00000168701	TMEM208	0.444381	0.0325954
ENSG00000131981	LGALS3	0.30806	0.0326411
ENSG00000273899	NOL12	0.860053	0.0326711
ENSG00000173141	MRPL57	0.369075	0.0328179
ENSG00000181019	NQO1	0.322296	0.0329194
ENSG00000187566	NHLRC1	0.812462	0.0330056
ENSG00000095485	CWF19L1	0.569759	0.0331804
ENSG00000168298	H1-4	0.904544	0.0332555
ENSG00000101363	MANBAL	0.372135	0.0332741
ENSG00000127445	PIN1	0.518362	0.0337807
ENSG00000070413	DGCR2	0.471488	0.0338051
ENSG00000004975	DVL2	0.42549	0.033928
ENSG00000167113	COQ4	0.45228	0.0341563
ENSG00000105135	ILVBL	0.538567	0.0345763
ENSG00000198918	RPL39	0.533133	0.0345876
ENSG00000169223	LMAN2	0.433414	0.0346245
ENSG00000100348	TXN2	0.410427	0.0346571
ENSG00000088543	C3orf18	0.626123	0.0347424
ENSG00000100865	CINP	0.376667	0.034836
ENSG00000163479	SSR2	0.302832	0.0348466
ENSG00000162191	UBXN1	0.401738	0.0350978
ENSG00000105472	CLEC11A	0.501864	0.0351585
ENSG00000103248	MTHFSD	0.717512	0.035174
ENSG00000104960	PTOV1	0.432929	0.0353248
ENSG00000163382	NAXE	0.412196	0.0354614
ENSG00000166313	APBB1	0.417978	0.0355668
ENSG00000164106	SCRG1	0.716609	0.0356562
ENSG00000163933	RFT1	0.548653	0.0358532
ENSG00000161011	SQSTM1	0.356399	0.0360968
ENSG00000137563	GGH	0.668613	0.0361566
ENSG00000149932	TMEM219	0.40516	0.0361944
ENSG00000100908	EMC9	0.629731	0.0363278
ENSG00000137274	BPHL	0.446607	0.0364227
ENSG00000234745	HLA-B	0.39383	0.0366187
ENSG00000196839	ADA	0.328175	0.0366367
ENSG00000108826	MRPL27	0.361507	0.0366461
ENSG00000079805	DNM2	0.491253	0.036693
ENSG00000103876	FAH	0.38945	0.0367373
ENSG00000103512	NOMO1	0.43961	0.036764
ENSG00000135390	ATP5MC2	0.323505	0.03678
ENSG00000173915	ATP5MK	0.340276	0.0368157
ENSG00000177830	CHID1	0.373818	0.0370262
ENSG00000007255	TRAPPC6A	0.612211	0.0370725
ENSG00000130881	LRP3	1.27079	0.0371222
ENSG00000136908	DPM2	0.409004	0.0371767
ENSG00000168904	LRRC28	0.551886	0.0371798
ENSG00000244625	MIATNB	1.08152	0.0372419
ENSG00000110492	MDK	0.470579	0.0372577
ENSG00000103254	ANTKMT	0.674262	0.0373261
ENSG00000136630	HLX	0.71602	0.0373468
ENSG00000184897	H1-10	0.425474	0.0375823
ENSG00000118508	RAB32	0.292564	0.0376157
ENSG00000204344	STK19	0.654696	0.0377425
ENSG00000165916	PSMC3	0.35818	0.0384455
ENSG00000183172	SMDT1	0.442302	0.0384636
ENSG00000064545	TMEM161A	0.681694	0.0386831
ENSG00000116809	ZBTB17	0.591147	0.0388327
ENSG00000183597	TANGO2	0.536896	0.0389254
ENSG00000105355	PLIN3	0.426008	0.038981
ENSG00000159423	ALDH4A1	0.709479	0.039054
ENSG00000143252	SDHC	0.341959	0.0390721
ENSG00000126088	UROD	0.328164	0.0391855
ENSG00000188243	COMMD6	0.35217	0.0392359
ENSG00000161558	TMEM143	0.648184	0.0394241
ENSG00000007080	CCDC124	0.542978	0.0394266
ENSG00000185813	PCYT2	0.407479	0.0394523
ENSG00000159173	TNNI1	0.400695	0.0394685
ENSG00000130299	GTPBP3	0.971688	0.0394836
ENSG00000102309	PIN4	0.31869	0.0395257
ENSG00000157911	PEX10	0.685025	0.0395807
ENSG00000135446	CDK4	0.289508	0.0397276
ENSG00000176095	IP6K1	0.519806	0.039846
ENSG00000232388	SMIM26	0.386852	0.0398681
ENSG00000120725	SIL1	0.396758	0.0400463
ENSG00000106638	TBL2	0.437486	0.0400677
ENSG00000105538	RASIP1	0.755906	0.040099
ENSG00000176046	NUPR1	0.470113	0.0401577
ENSG00000176101	SSNA1	0.473756	0.0402125
ENSG00000128463	EMC4	0.345085	0.0403905
ENSG00000130193	THEM6	0.828389	0.0404346
ENSG00000119673	ACOT2	0.47271	0.04058
ENSG00000182165	TP53TG1	0.478016	0.0407924
ENSG00000167863	ATP5PD	0.327293	0.0407961
ENSG00000111640	GAPDH	0.288611	0.0408296
ENSG00000165898	ISCA2	0.394954	0.0409755
ENSG00000184164	CRELD2	0.546584	0.0410629
ENSG00000204525	HLA-C	0.41902	0.0411209
ENSG00000275630		0.872783	0.0411565
ENSG00000110906	KCTD10	0.312793	0.0411858
ENSG00000157551	KCNJ15	1.00802	0.0412314
ENSG00000042753	AP2S1	0.320928	0.041313
ENSG00000090674	MCOLN1	0.602879	0.0413493
ENSG00000160256	SLX9	0.901457	0.0414846
ENSG00000124659	TBCC	0.409914	0.0415029
ENSG00000183648	NDUFB1	0.417593	0.0415783
ENSG00000169715	MT1E	0.470741	0.0417036
ENSG00000163882	POLR2H	0.348788	0.0417176
ENSG00000183624	HMCES	0.386256	0.0418191
ENSG00000128309	MPST	0.51362	0.042073
ENSG00000100591	AHSA1	0.30813	0.0420829
ENSG00000114268	PFKFB4	1.10442	0.0421066
ENSG00000164929	BAALC	0.300164	0.042255
ENSG00000116857	TMEM9	0.39855	0.0422751
ENSG00000116586	LAMTOR2	0.446282	0.0422894
ENSG00000074582	BCS1L	0.45295	0.0426335
ENSG00000071564	TCF3	0.974832	0.0429413
ENSG00000131634	TMEM204	0.560702	0.0429533
ENSG00000075914	EXOSC7	0.371892	0.0434261
ENSG00000149257	SERPINH1	0.378062	0.0434937
ENSG00000137168	PPIL1	0.506806	0.0435769
ENSG00000172638	EFEMP2	0.361887	0.0437087
ENSG00000198755	RPL10A	0.357808	0.0437956
ENSG00000185838	GNB1L	1.03113	0.0438934
ENSG00000146733	PSPH	0.436495	0.0440982
ENSG00000100106	TRIOBP	0.343899	0.0444389
ENSG00000090097	PCBP4	0.425356	0.0444792
ENSG00000198736	MSRB1	0.56709	0.0445394
ENSG00000133895	MEN1	0.469407	0.0446492
ENSG00000188015	S100A3	1.70982	0.0446605
ENSG00000116649	SRM	0.332179	0.0447147
ENSG00000165915	SLC39A13	0.454638	0.0447342
ENSG00000023191	RNH1	0.455833	0.0448292
ENSG00000170892	TSEN34	0.397349	0.0448692
ENSG00000130770	ATP5IF1	0.326815	0.045023
ENSG00000114745	GORASP1	0.502784	0.0451831
ENSG00000142227	EMP3	0.347221	0.0451912
ENSG00000247595	MISFA	1.08729	0.0453111
ENSG00000125821	DTD1	0.456853	0.0453707
ENSG00000178149	DALRD3	0.401211	0.0454003
ENSG00000184900	SUMO3	0.307392	0.045527
ENSG00000159720	ATP6V0D1	0.294866	0.045721
ENSG00000111669	TPI1	0.325723	0.045989
ENSG00000085117	CD82	0.48064	0.0461571
ENSG00000068001	HYAL2	0.390181	0.0461637
ENSG00000067829	IDH3G	0.385437	0.0462978
ENSG00000159714	ZDHHC1	0.450407	0.0464534
ENSG00000100029	PES1	0.348254	0.04648
ENSG00000178307	TMEM11	0.381574	0.0466318
ENSG00000148291	SURF2	0.54548	0.046696
ENSG00000122390	NAA60	0.480109	0.046807
ENSG00000179431	FJX1	0.851141	0.0468111
ENSG00000103245	CIAO3	0.636698	0.046835
ENSG00000226124	FTCDNL1	1.07481	0.0471785
ENSG00000008517	IL32	0.442354	0.0472068
ENSG00000104915	STX10	0.397252	0.0472283
ENSG00000163156	SCNM1	0.362323	0.0473579
ENSG00000090581	GNPTG	0.344702	0.0474002
ENSG00000156603	MED19	0.383705	0.0474992
ENSG00000125826	RBCK1	0.405414	0.0475602
ENSG00000167967	E4F1	0.599701	0.0476091
ENSG00000111653	ING4	0.393215	0.0476153
ENSG00000086189	DIMT1	0.40281	0.0476488
ENSG00000070371	CLTCL1	0.727939	0.047677
ENSG00000136052	SLC41A2	0.946576	0.0477564
ENSG00000154217	PITPNC1	0.701544	0.0478087
ENSG00000122026	RPL21	0.321304	0.0478484
ENSG00000141698	NT5C3B	0.332559	0.0479757
ENSG00000109610	SOD3	0.641242	0.0479804
ENSG00000171130	ATP6V0E2	0.776479	0.0480466
ENSG00000100299	ARSA	0.660123	0.0481375
ENSG00000106399	RPA3	0.565759	0.0482323
ENSG00000185049	NELFA	0.630627	0.0483327
ENSG00000105696	TMEM59L	0.557771	0.0483914
ENSG00000159403	C1R	0.342425	0.0484355
ENSG00000185627	PSMD13	0.282708	0.0485501
ENSG00000168090	COPS6	0.349233	0.0485782
ENSG00000149480	MTA2	0.894735	0.0487987
ENSG00000124299	PEPD	0.373705	0.0488871
ENSG00000161714	PLCD3	0.731864	0.048904
ENSG00000168002	POLR2G	0.295723	0.0491019
ENSG00000162076	FLYWCH2	0.551236	0.0491455
ENSG00000119705	SLIRP	0.33437	0.0491589
ENSG00000174684	B4GAT1	0.496822	0.0492507
ENSG00000168389	MFSD2A	1.977	0.0493068
ENSG00000183087	GAS6	0.375606	0.0493848
ENSG00000090372	STRN4	0.378683	0.0494258
ENSG00000116288	PARK7	0.291909	0.0496096
ENSG00000162585	FAAP20	0.454083	0.0497044
ENSG00000129038	LOXL1	0.436334	0.0497517
ENSG00000234287	RPS27P4	0.579241	0.0498379
ENSG00000167930	FAM234A	0.395773	0.049838
ENSG00000167770	OTUB1	0.393382	0.0499385
Supp. Table 3. Complete list of DEG significantly upregulated genes (p-value <0.05) on the model of intramuscular adipose tissue subjected to space exposome exposure (n=3) compared to the ground control (n=3) in logFC.
Non-protein-coding DEG are highlight in italic.* = FDR < 0.05.

## Sheet: DOWNREGULATED DEG
ensembl	Symbol	LogFC	p-Value	FDR < 0.05
ENSG00000171617	ENC1	-3.21104	2.19983e-06	*
ENSG00000196569	LAMA2	-0.957388	5.13078e-06	*
ENSG00000178343	SHISA3	-6.72248	7.60298e-06	*
ENSG00000184226	PCDH9	-1.09751	1.34275e-05	*
ENSG00000280241	DCHS2-AS	-1.88378	1.54718e-05	*
ENSG00000171100	MTM1	-1.54506	2.43238e-05	*
ENSG00000115919	KYNU	-6.70178	2.74656e-05	*
ENSG00000180773	SLC36A4	-1.13752	3.45096e-05	*
ENSG00000178752	ERFE	-6.89994	3.78982e-05	*
ENSG00000144674	GOLGA4	-0.860075	3.82576e-05	*
ENSG00000100664	EIF5	-0.730686	4.09404e-05	*
ENSG00000139278	GLIPR1	-0.725356	7.02836e-05	*
ENSG00000054267	ARID4B	-0.969381	7.07748e-05	*
ENSG00000138688	BLTP1	-1.5594	7.54102e-05	*
ENSG00000119900	OGFRL1	-0.904506	7.77738e-05	*
ENSG00000167785	ZNF558	-1.37542	0.00010622	*
ENSG00000066933	MYO9A	-1.25584	0.000112371	*
ENSG00000227619		-6.48906	0.000133623	*
ENSG00000178031	ADAMTSL1	-1.71157	0.000139011	*
ENSG00000143127	ITGA10	-1.91425	0.000147565	*
ENSG00000108960	MMD	-0.754246	0.000161515	*
ENSG00000245532	NEAT1	-1.02266	0.000167455	*
ENSG00000137807	KIF23	-3.878	0.000214052	*
ENSG00000177189	RPS6KA3	-1.02487	0.000218657	*
ENSG00000104756	KCTD9	-0.936407	0.000226601	*
ENSG00000121749	TBC1D15	-0.699874	0.000229336	*
ENSG00000117000	RLF	-1.37692	0.000245525	*
ENSG00000119707	RBM25	-0.749866	0.000257206	*
ENSG00000007168	PAFAH1B1	-0.846776	0.000257282	*
ENSG00000308375		-5.71517	0.00032629	*
ENSG00000150672	DLG2	-2.89257	0.00032825	*
ENSG00000116793	PHTF1	-1.31624	0.000351699	*
ENSG00000185658	BRWD1	-0.791476	0.000365355	*
ENSG00000033178	UBA6	-1.348	0.000375416	*
ENSG00000198947	DMD	-1.25882	0.000380877	*
ENSG00000136100	VPS36	-0.6296	0.000409177	*
ENSG00000145495	MARCHF6	-0.833795	0.000414069	*
ENSG00000116747	RO60	-0.610283	0.000442676	*
ENSG00000109654	TRIM2	-2.22491	0.000461362	*
ENSG00000237298	TTN-AS1	-1.33655	0.000461558	*
ENSG00000157107	FCHO2	-1.23886	0.000464098	*
ENSG00000065809	FAM107B	-0.925232	0.000467293	*
ENSG00000136141	LRCH1	-1.44286	0.00048188	*
ENSG00000145779	TNFAIP8	-1.05815	0.00048711	*
ENSG00000132549	VPS13B	-1.18016	0.000516913	*
ENSG00000136153	LMO7	-1.11539	0.000543054	*
ENSG00000118402	ELOVL4	-1.44624	0.000554136	*
ENSG00000177853	ZNF518A	-1.31663	0.000575031	*
ENSG00000262655	SPON1	-1.23772	0.000611186	*
ENSG00000135976	ANKRD36	-1.25654	0.000633457	*
ENSG00000163755	HPS3	-0.836402	0.000715892	*
ENSG00000171681	ATF7IP	-0.706447	0.000745164	*
ENSG00000143322	ABL2	-1.55261	0.000812102
ENSG00000108510	MED13	-1.44467	0.000825799
ENSG00000163104	SMARCAD1	-0.85165	0.000852996
ENSG00000231298	MANCR	-2.69351	0.000908434
ENSG00000164219	PGGT1B	-1.03786	0.000915109
ENSG00000172954	LCLAT1	-1.37779	0.00115092
ENSG00000151474	FRMD4A	-1.34116	0.00120845
ENSG00000060982	BCAT1	-0.724958	0.0012095
ENSG00000135040	NAA35	-1.04794	0.00128626
ENSG00000176971	FIBIN	-0.938185	0.00132007
ENSG00000281649	EBLN3P	-1.22167	0.00132604
ENSG00000128567	PODXL	-1.71136	0.00132719
ENSG00000170759	KIF5B	-0.44029	0.00147941
ENSG00000122591	HYCC1	-0.629875	0.00149671
ENSG00000060237	WNK1	-1.34594	0.0015059
ENSG00000157741	UBN2	-2.61715	0.00153174
ENSG00000171914	TLN2	-0.890149	0.00153633
ENSG00000297925	PTPRG-AS	-2.82939	0.00153939
ENSG00000135341	MAP3K7	-0.668492	0.00154341
ENSG00000164543	STK17A	-0.633357	0.00154367
ENSG00000197535	MYO5A	-0.996595	0.00154955
ENSG00000108395	TRIM37	-0.989862	0.0015602
ENSG00000138386	NAB1	-1.64416	0.00156093
ENSG00000180628	PCGF5	-0.765664	0.00156173
ENSG00000132424	PNISR	-0.586338	0.00157313
ENSG00000188529	SRSF10	-0.495583	0.00159673
ENSG00000162804	SNED1	-1.21389	0.00174418
ENSG00000009413	REV3L	-0.844697	0.00174735
ENSG00000101752	MIB1	-1.13095	0.00175311
ENSG00000129003	VPS13C	-0.917509	0.00179207
ENSG00000142188	TMEM50B	-0.552275	0.0018013
ENSG00000198743	SLC5A3	-1.75931	0.00180561
ENSG00000069275	NUCKS1	-0.779562	0.00181159
ENSG00000146918	NCAPG2	-1.26162	0.00182722
ENSG00000134853	PDGFRA	-0.656442	0.00182923
ENSG00000032742	IFT88	-0.864664	0.0018653
ENSG00000144357	UBR3	-1.16553	0.00187038
ENSG00000116539	ASH1L	-1.00496	0.00205814
ENSG00000014123	UFL1	-0.610482	0.00214601
ENSG00000087470	DNM1L	-0.623907	0.00217767
ENSG00000083223	TUT7	-0.998055	0.00221511
ENSG00000225830	ERCC6	-1.13788	0.00228633
ENSG00000162923	WDR26	-1.09479	0.00240676
ENSG00000060339	CCAR1	-0.548046	0.00241551
ENSG00000155657	TTN	-1.03925	0.00252138
ENSG00000153207	AHCTF1	-1.05143	0.00252452
ENSG00000086758	HUWE1	-1.063	0.00265336
ENSG00000151694	ADAM17	-0.731429	0.00265383
ENSG00000085832	EPS15	-0.677207	0.00279747
ENSG00000154380	ENAH	-0.805641	0.00296959
ENSG00000137944	KYAT3	-0.567747	0.00303266
ENSG00000101670	LIPG	-0.821661	0.00303486
ENSG00000111371	SLC38A1	-0.943523	0.00306698
ENSG00000145246	ATP10D	-0.918331	0.00308416
ENSG00000169641	LUZP1	-0.72732	0.00320396
ENSG00000167637	ZNF283	-1.6045	0.0032124
ENSG00000289384		-1.95304	0.00330488
ENSG00000138768	USO1	-0.639271	0.00338021
ENSG00000038427	VCAN	-0.612352	0.00343193
ENSG00000006459	KDM7A	-1.72109	0.00343811
ENSG00000113389	NPR3	-1.77564	0.00355551
ENSG00000171509	RXFP1	-4.71653	0.00357965
ENSG00000177888	ZBTB41	-1.11821	0.00365565
ENSG00000100739	BDKRB1	-5.03338	0.00377499
ENSG00000093000	NUP50	-0.927121	0.00380281
ENSG00000105835	NAMPT	-0.524249	0.0038743
ENSG00000107863	ARHGAP21	-1.10629	0.00388991
ENSG00000182158	CREB3L2	-0.680887	0.00402498
ENSG00000157224	CLDN12	-0.728754	0.0040491
ENSG00000122435	TRMT13	-1.04145	0.00406323
ENSG00000173230	GOLGB1	-0.661534	0.0041349
ENSG00000110422	HIPK3	-0.751636	0.00427473
ENSG00000087586	AURKA	-1.39403	0.00429507
ENSG00000116918	TSNAX	-0.692124	0.00434644
ENSG00000198919	DZIP3	-0.883222	0.00435135
ENSG00000117569	PTBP2	-0.983079	0.00448007
ENSG00000109466	KLHL2	-0.880373	0.00448679
ENSG00000136450	SRSF1	-1.00237	0.00451632
ENSG00000145780	FEM1C	-0.882782	0.00456808
ENSG00000113240	CLK4	-0.7731	0.00461774
ENSG00000129675	ARHGEF6	-0.672499	0.0047613
ENSG00000163006	CCDC138	-1.72929	0.00480578
ENSG00000116095	PLEKHA3	-0.853664	0.00483447
ENSG00000122484	RPAP2	-0.700914	0.00489059
ENSG00000111331	OAS3	-1.72108	0.00491654
ENSG00000168461	RAB31	-0.450135	0.0050466
ENSG00000170248	PDCD6IP	-0.545466	0.00506948
ENSG00000085224	ATRX	-0.687913	0.0050924
ENSG00000106415	GLCCI1	-1.66103	0.00511845
ENSG00000038382	TRIO	-1.23421	0.00517026
ENSG00000151233	GXYLT1	-1.01669	0.00517746
ENSG00000153914	SREK1	-0.587177	0.0051823
ENSG00000179593	ALOX15B	-3.17372	0.00528557
ENSG00000123106	CCDC91	-0.643606	0.00532836
ENSG00000156735	BAG4	-0.89404	0.00547079
ENSG00000155324	GRAMD2B	-0.639417	0.00549275
ENSG00000181938	GINS3	-1.56735	0.00550635
ENSG00000198231	DDX42	-0.902169	0.00551006
ENSG00000162378	ZYG11B	-0.998604	0.00551354
ENSG00000125633	CCDC93	-0.893159	0.00551982
ENSG00000088970	KIZ	-0.714127	0.00554451
ENSG00000164506	STXBP5	-1.05667	0.0055469
ENSG00000137494	ANKRD42	-1.00912	0.00555195
ENSG00000114331	ACAP2	-0.639944	0.00559521
ENSG00000112159	MDN1	-1.21028	0.00567684
ENSG00000081377	CDC14B	-0.777151	0.00570374
ENSG00000230590	FTX	-1.30855	0.00570561
ENSG00000113580	NR3C1	-0.437574	0.00576234
ENSG00000178202	POGLUT3	-0.62409	0.00576358
ENSG00000030066	NUP160	-0.64107	0.00576747
ENSG00000114374	USP9Y	-1.39486	0.00578094
ENSG00000250337	PURPL	-0.968292	0.00581885
ENSG00000119912	IDE	-0.598427	0.00588543
ENSG00000145685	LHFPL2	-1.0266	0.00604855
ENSG00000020577	SAMD4A	-1.66551	0.00612213
ENSG00000197497	ZNF665	-1.14752	0.0062131
ENSG00000092148	HECTD1	-0.762702	0.00628185
ENSG00000107669	ATE1	-0.589053	0.00634761
ENSG00000116406	EDEM3	-0.78154	0.00643211
ENSG00000174652	ZNF266	-0.892514	0.00648988
ENSG00000113594	LIFR	-0.889094	0.00649399
ENSG00000164830	OXR1	-0.52669	0.00650289
ENSG00000145332	KLHL8	-1.05749	0.00654373
ENSG00000151917	BEND6	-0.610311	0.00672979
ENSG00000123094	RASSF8	-0.907564	0.00674596
ENSG00000166923	GREM1	-0.903922	0.00683576
ENSG00000108021	TASOR2	-1.02986	0.00685723
ENSG00000070367	EXOC5	-0.502119	0.00693821
ENSG00000107951	MTPAP	-1.12123	0.0069992
ENSG00000169398	PTK2	-0.670865	0.00708312
ENSG00000171862	PTEN	-0.426386	0.00724421
ENSG00000244405	ETV5	-0.788458	0.00733151
ENSG00000205765	RIMOC1	-0.921342	0.00736848
ENSG00000061676	NCKAP1	-0.485805	0.00737946
ENSG00000111424	VDR	-1.20811	0.0074338
ENSG00000132640	BTBD3	-0.815016	0.00744616
ENSG00000106723	SPIN1	-0.560091	0.00751859
ENSG00000158615	PPP1R15B	-0.814887	0.00753838
ENSG00000290746	CA5BP1	-1.00559	0.00760575
ENSG00000163512	AZI2	-0.496305	0.00767747
ENSG00000156273	BACH1	-0.93996	0.00773254
ENSG00000163660	CCNL1	-0.818521	0.0077631
ENSG00000125676	THOC2	-0.519701	0.00776976
ENSG00000184113	CLDN5	-4.71804	0.00779485
ENSG00000108582	CPD	-0.749821	0.00789937
ENSG00000119402	FBXW2	-0.625339	0.00791736
ENSG00000118971	CCND2	-0.490608	0.00793371
ENSG00000183354	BRD10	-1.12655	0.00797068
ENSG00000157181	ODR4	-0.573582	0.00810339
ENSG00000153560	UBP1	-0.963775	0.00812778
ENSG00000121486	TRMT1L	-0.662374	0.00827146
ENSG00000170471	RALGAPB	-0.762531	0.00828965
ENSG00000156162	DPY19L4	-0.749779	0.00836151
ENSG00000133805	AMPD3	-1.7417	0.00837798
ENSG00000122870	BICC1	-1.07158	0.00848256
ENSG00000145740	SLC30A5	-0.503941	0.0086015
ENSG00000111647	BLTP3B	-0.674074	0.00867225
ENSG00000163428	LRRC58	-0.729624	0.00871856
ENSG00000048392	RRM2B	-0.564787	0.00879546
ENSG00000164125	GASK1B	-0.667085	0.0088641
ENSG00000185129	PURA	-1.2303	0.00888824
ENSG00000165156	ZHX1	-0.659546	0.00891388
ENSG00000123977	DAW1	-2.21725	0.00899083
ENSG00000147862	NFIB	-0.730497	0.00903172
ENSG00000198836	OPA1	-0.680369	0.00914073
ENSG00000198018	ENTPD7	-1.30042	0.00926182
ENSG00000117616	RSRP1	-0.683609	0.00930519
ENSG00000111981	ULBP1	-1.01064	0.00931721
ENSG00000047346	ATOSA	-1.15085	0.00936306
ENSG00000055332	EIF2AK2	-0.71119	0.0093773
ENSG00000079931	MOXD1	-0.644521	0.00943699
ENSG00000065413	ANKRD44	-1.34593	0.00944404
ENSG00000166233	ARIH1	-0.962644	0.00951589
ENSG00000164402	SEPTIN8	-0.885865	0.00955973
ENSG00000254004	ZNF260	-0.890788	0.00969378
ENSG00000135679	MDM2	-0.855927	0.00971526
ENSG00000165416	SUGT1	-0.433874	0.00982104
ENSG00000164169	PRMT9	-0.914489	0.00987504
ENSG00000115145	STAM2	-0.842598	0.0100061
ENSG00000147202	DIAPH2	-0.62281	0.010007
ENSG00000164683	HEY1	-1.99194	0.0100165
ENSG00000138674	SEC31A	-0.372554	0.0100471
ENSG00000185246	PRPF39	-0.784232	0.0100698
ENSG00000129116	PALLD	-0.467669	0.0101726
ENSG00000189180	ZNF33A	-0.942771	0.01023
ENSG00000197863	ZNF790	-1.21564	0.0103636
ENSG00000146963	LUC7L2	-0.702791	0.0104855
ENSG00000172939	OXSR1	-0.761541	0.0105869
ENSG00000133961	NUMB	-0.439344	0.0106729
ENSG00000103994	ZNF106	-0.486746	0.0108421
ENSG00000171051	FPR1	-1.82017	0.0108477
ENSG00000137727	ARHGAP20	-1.66865	0.0110788
ENSG00000124151	NCOA3	-0.924827	0.0110932
ENSG00000182752	PAPPA	-1.23943	0.0111107
ENSG00000168092	PAFAH1B2	-0.725376	0.0112032
ENSG00000113161	HMGCR	-0.706274	0.0112137
ENSG00000117500	TMED5	-0.517633	0.0112958
ENSG00000120156	TEK	-2.04748	0.0114737
ENSG00000105976	MET	-1.5627	0.0114783
ENSG00000151914	DST	-0.642893	0.0115156
ENSG00000143815	LBR	-0.46103	0.011682
ENSG00000141367	CLTC	-0.529599	0.0118205
ENSG00000144504	ANKMY1	-1.86799	0.0118747
ENSG00000161813	LARP4	-0.700732	0.011879
ENSG00000139163	ETNK1	-0.747388	0.0118957
ENSG00000105879	CBLL1	-0.649624	0.0119644
ENSG00000164654	MIOS	-0.705979	0.0119828
ENSG00000198380	GFPT1	-0.42586	0.0121696
ENSG00000035687	ADSS2	-0.634778	0.0122507
ENSG00000125630	POLR1B	-0.841675	0.0123289
ENSG00000114127	XRN1	-0.921453	0.0123579
ENSG00000138639	ARHGAP24	-0.469114	0.0123579
ENSG00000196912	ANKRD36B	-1.26236	0.0123956
ENSG00000198689	SLC9A6	-1.02016	0.0124493
ENSG00000115461	IGFBP5	-0.362968	0.0124761
ENSG00000185009	AP3M1	-0.485773	0.0125433
ENSG00000198589	LRBA	-0.963116	0.0125741
ENSG00000167904	TMEM68	-0.69841	0.0127668
ENSG00000073792	IGF2BP2	-0.614192	0.0127713
ENSG00000137033	IL33	-0.918584	0.0127994
ENSG00000057019	DCBLD2	-0.734119	0.0128079
ENSG00000196628	TCF4	-0.583214	0.0128697
ENSG00000198793	MTOR	-1.04868	0.0129039
ENSG00000163281	GNPDA2	-0.540858	0.0129848
ENSG00000100503	NIN	-0.894701	0.0130171
ENSG00000189079	ARID2	-1.17048	0.0130913
ENSG00000114062	UBE3A	-0.430401	0.0131134
ENSG00000182919	C11orf54	-0.693339	0.0131868
ENSG00000134313	KIDINS220	-0.636611	0.0132479
ENSG00000100796	PPP4R3A	-0.696796	0.0133319
ENSG00000163110	PDLIM5	-0.519091	0.0133411
ENSG00000257621	PSMA3-AS1	-0.806409	0.0133846
ENSG00000106799	TGFBR1	-0.643419	0.0134423
ENSG00000182670	TTC3	-0.438563	0.0134531
ENSG00000196776	CD47	-0.427123	0.013573
ENSG00000141425	RPRD1A	-0.723545	0.0135787
ENSG00000072274	TFRC	-0.441454	0.0136602
ENSG00000163320	CGGBP1	-0.658837	0.0137061
ENSG00000111300	NAA25	-0.80971	0.0137931
ENSG00000115935	WIPF1	-0.670084	0.0138353
ENSG00000108599	AKAP10	-0.547272	0.0138988
ENSG00000078674	PCM1	-0.604166	0.0139306
ENSG00000181004	BBS12	-1.0316	0.0139921
ENSG00000126777	KTN1	-0.419337	0.0140042
ENSG00000154736	ADAMTS5	-0.61431	0.0140333
ENSG00000132388	UBE2G1	-0.500283	0.0141045
ENSG00000168779	SHOX2	-0.851473	0.0141335
ENSG00000159200	RCAN1	-0.481499	0.0142889
ENSG00000077232	DNAJC10	-0.462695	0.0144541
ENSG00000162733	DDR2	-0.505378	0.0146535
ENSG00000149554	CHEK1	-1.18297	0.0147138
ENSG00000079215	SLC1A3	-0.874497	0.0147762
ENSG00000068305	MEF2A	-0.610725	0.0148267
ENSG00000152926	ZNF117	-1.05789	0.0148286
ENSG00000148943	LIN7C	-0.522636	0.0148523
ENSG00000130818	ZNF426	-0.947536	0.0149077
ENSG00000100934	SEC23A	-0.337738	0.0151083
ENSG00000166261	ZNF202	-1.41224	0.0151779
ENSG00000293434	AHSA2P	-1.17583	0.0152428
ENSG00000135678	CPM	-0.683859	0.015247
ENSG00000174405	LIG4	-1.08649	0.0153339
ENSG00000185404	SP140L	-0.699403	0.0155766
ENSG00000073921	PICALM	-0.580254	0.015602
ENSG00000119636	BBOF1	-0.834867	0.015611
ENSG00000129315	CCNT1	-1.12126	0.0156238
ENSG00000153827	TRIP12	-0.739862	0.0156487
ENSG00000067704	IARS2	-0.449132	0.0158373
ENSG00000107771	CCSER2	-0.588578	0.0158763
ENSG00000164292	RHOBTB3	-0.477486	0.0158865
ENSG00000111596	CNOT2	-0.427638	0.0160467
ENSG00000259366	HMBOX1-AS	-1.18567	0.0160734
ENSG00000145375	AFG2A	-1.63073	0.0160761
ENSG00000172766	NAA16	-1.28777	0.01612
ENSG00000163029	SMC6	-0.520316	0.0162
ENSG00000005483	KMT2E	-0.490183	0.0162154
ENSG00000112697	TMEM30A	-0.440239	0.0163456
ENSG00000117020	AKT3	-0.968544	0.0163855
ENSG00000122257	RBBP6	-0.609408	0.0165591
ENSG00000080546	SESN1	-0.524573	0.0165914
ENSG00000060656	PTPRU	-1.06018	0.0167024
ENSG00000165029	ABCA1	-0.720951	0.0167353
ENSG00000101745	ANKRD12	-0.552982	0.0168578
ENSG00000138119	MYOF	-0.463286	0.0168982
ENSG00000101974	ATP11C	-1.08252	0.0169037
ENSG00000157214	STEAP2	-1.05268	0.017142
ENSG00000018189	RUFY3	-0.519722	0.0171427
ENSG00000221923	ZNF880	-0.576137	0.0172989
ENSG00000116690	PRG4	-0.599807	0.0174236
ENSG00000138468	SENP7	-0.888767	0.0174697
ENSG00000175054	ATR	-0.937506	0.0174786
ENSG00000169967	MAP3K2	-0.624051	0.0175231
ENSG00000116922	AIRIM	-0.630563	0.0175338
ENSG00000100815	TRIP11	-0.793166	0.0176342
ENSG00000256294	ZNF225	-1.17952	0.0176861
ENSG00000095209	TMEM38B	-0.402826	0.0177975
ENSG00000155085	AK9	-1.08828	0.0178264
ENSG00000197121	PGAP1	-1.44462	0.0178314
ENSG00000172260	NEGR1	-1.13238	0.0178447
ENSG00000164938	TP53INP1	-0.824617	0.0179048
ENSG00000230630	DNM3OS	-0.731913	0.0179335
ENSG00000291152	SBDSP1	-0.547988	0.0179377
ENSG00000166128	RAB8B	-0.465692	0.017999
ENSG00000138032	PPM1B	-0.812885	0.0181466
ENSG00000065911	MTHFD2	-0.502528	0.0183435
ENSG00000136051	WASHC4	-0.53235	0.0184755
ENSG00000055130	CUL1	-0.416935	0.0184867
ENSG00000152894	PTPRK	-0.638047	0.0186032
ENSG00000156535	CD109	-0.718234	0.0186344
ENSG00000151292	CSNK1G3	-0.592131	0.0187213
ENSG00000135541	AHI1	-0.599743	0.0187888
ENSG00000076641	PAG1	-1.19461	0.0188008
ENSG00000048052	HDAC9	-1.78263	0.018808
ENSG00000112078	KCTD20	-0.481388	0.0188664
ENSG00000133706	LARS1	-0.434165	0.018949
ENSG00000138434	ITPRID2	-0.656356	0.0190973
ENSG00000100485	SOS2	-0.891688	0.0191572
ENSG00000136536	MARCHF7	-0.38179	0.0191606
ENSG00000075413	MARK3	-0.438749	0.0192205
ENSG00000005889	ZFX	-0.825917	0.0193136
ENSG00000170677	SOCS6	-0.618294	0.0194684
ENSG00000107581	EIF3A	-0.493735	0.0196154
ENSG00000151883	PARP8	-1.22612	0.0196983
ENSG00000162695	SLC30A7	-0.679785	0.019923
ENSG00000177425	PAWR	-0.850334	0.0200532
ENSG00000153015	CWC27	-0.440168	0.0202664
ENSG00000123728	RAP2C	-0.755326	0.0203315
ENSG00000139505	MTMR6	-0.520254	0.0204477
ENSG00000153317	ASAP1	-0.711916	0.0205584
ENSG00000145439	CBR4	-0.693456	0.020606
ENSG00000137831	UACA	-0.396815	0.0206137
ENSG00000268205		-1.36189	0.0206714
ENSG00000165259	HDX	-1.03482	0.0206743
ENSG00000177694	NAALADL2	-0.717524	0.0207392
ENSG00000162402	USP24	-1.0577	0.0207956
ENSG00000198961	PJA2	-0.464725	0.020817
ENSG00000164930	FZD6	-0.775629	0.0208699
ENSG00000127481	UBR4	-0.811847	0.0208755
ENSG00000111530	CAND1	-0.478272	0.0210049
ENSG00000255717	SNHG1	-1.38598	0.0210829
ENSG00000290926	LINC03006	-0.983842	0.0211597
ENSG00000137962	ARHGAP29	-0.47273	0.0211659
ENSG00000091129	NRCAM	-0.799769	0.0211975
ENSG00000074657	ZNF532	-0.712686	0.0212007
ENSG00000089050	RBBP9	-0.700234	0.0212314
ENSG00000138758	SEPTIN11	-0.393761	0.0212701
ENSG00000189221	MAOA	-0.605044	0.0213722
ENSG00000160131	VMA21	-0.582136	0.0213912
ENSG00000196652	ZKSCAN5	-0.848911	0.0213945
ENSG00000138814	PPP3CA	-0.772363	0.0214479
ENSG00000138071	ACTR2	-0.663458	0.0217562
ENSG00000198707	CEP290	-0.648268	0.0217588
ENSG00000111885	MAN1A1	-0.490749	0.021769
ENSG00000205730	ITPRIPL2	-1.08275	0.021857
ENSG00000115310	RTN4	-0.380407	0.0218902
ENSG00000131711	MAP1B	-0.52184	0.021957
ENSG00000101557	USP14	-0.380418	0.0219856
ENSG00000181722	ZBTB20	-0.907466	0.0220606
ENSG00000153904	DDAH1	-0.721616	0.022119
ENSG00000082438	COBLL1	-2.01365	0.0223411
ENSG00000111605	CPSF6	-0.376506	0.0224375
ENSG00000198440	ZNF583	-0.720814	0.022548
ENSG00000119396	RAB14	-0.331084	0.022706
ENSG00000026652	AGPAT4	-1.06217	0.0227871
ENSG00000128641	MYO1B	-0.451605	0.0229068
ENSG00000122550	KLHL7	-0.428462	0.0229113
ENSG00000069974	RAB27A	-1.02238	0.0229372
ENSG00000088930	XRN2	-0.394275	0.0230217
ENSG00000166881	NEMP1	-1.20537	0.023106
ENSG00000064726	BTBD1	-0.338059	0.0231645
ENSG00000140299	BNIP2	-0.439631	0.0232042
ENSG00000175449	RFESD	-1.29253	0.0232726
ENSG00000138802	SEC24B	-0.480585	0.0233839
ENSG00000170340	B3GNT2	-0.499428	0.0235394
ENSG00000091409	ITGA6	-1.67051	0.02359
ENSG00000109686	SH3D19	-0.447179	0.0236813
ENSG00000087206	UIMC1	-0.748279	0.0236951
ENSG00000115504	EHBP1	-0.670512	0.0237742
ENSG00000131018	SYNE1	-0.681123	0.0238961
ENSG00000015171	ZMYND11	-0.510931	0.0239193
ENSG00000132294	EFR3A	-0.664949	0.0240607
ENSG00000272886	DCP1A	-0.520884	0.0240647
ENSG00000129636	ITFG1	-0.435363	0.0240905
ENSG00000144224	UBXN4	-0.326047	0.0242993
ENSG00000148690	FRA10AC1	-0.487088	0.0243218
ENSG00000106344	RBM28	-0.649105	0.0243909
ENSG00000113638	TTC33	-0.630752	0.0245021
ENSG00000172164	SNTB1	-0.518079	0.0245777
ENSG00000138767	CNOT6L	-1.10075	0.0245899
ENSG00000148090	AUH	-0.593701	0.0248259
ENSG00000151881	TMEM267	-0.520827	0.0248532
ENSG00000184160	ADRA2C	-3.10831	0.0249446
ENSG00000181315	ZNF322	-0.973151	0.0249567
ENSG00000065613	SLK	-0.597211	0.0250601
ENSG00000179152	TCAIM	-0.585691	0.0250724
ENSG00000151012	SLC7A11	-0.856921	0.0251472
ENSG00000168434	COG7	-0.734495	0.0253159
ENSG00000205726	ITSN1	-0.489655	0.0253351
ENSG00000075711	DLG1	-0.625502	0.0254094
ENSG00000177200	CHD9	-0.600245	0.0255119
ENSG00000085491	SLC25A24	-0.501336	0.0255613
ENSG00000106868	SUSD1	-0.87848	0.0256345
ENSG00000171723	GPHN	-0.597731	0.0258088
ENSG00000133657	ATP13A3	-0.928994	0.0258325
ENSG00000133739	LRRCC1	-0.949221	0.0259186
ENSG00000139350	NEDD1	-0.520505	0.0261428
ENSG00000127720	METTL25	-0.996	0.026211
ENSG00000101751	POLI	-0.695484	0.0262182
ENSG00000162645	GBP2	-0.541323	0.0262363
ENSG00000089094	KDM2B	-1.2904	0.0262403
ENSG00000115761	NOL10	-0.570463	0.0265324
ENSG00000150760	DOCK1	-0.612646	0.0265347
ENSG00000167193	CRK	-0.342445	0.0265858
ENSG00000088832	FKBP1A	-0.57657	0.0265991
ENSG00000135535	CD164	-0.335501	0.0266237
ENSG00000151835	SACS	-1.36212	0.0266263
ENSG00000128513	POT1	-0.631557	0.0266828
ENSG00000134369	NAV1	-0.46747	0.026724
ENSG00000113300	CNOT6	-1.9106	0.0267824
ENSG00000177707	NECTIN3	-1.20786	0.0269669
ENSG00000119285	HEATR1	-0.688469	0.0269733
ENSG00000135164	DMTF1	-0.659726	0.0270048
ENSG00000158079	PTPDC1	-1.04891	0.0270202
ENSG00000124882	EREG	-2.1948	0.027353
ENSG00000145725	PPIP5K2	-0.661159	0.0276467
ENSG00000158417	EIF5B	-0.44814	0.0276501
ENSG00000172292	CERS6	-0.58333	0.0277103
ENSG00000177409	SAMD9L	-0.640732	0.0277995
ENSG00000025796	SEC63	-0.555222	0.0278819
ENSG00000175216	CKAP5	-0.525209	0.0279741
ENSG00000125257	ABCC4	-1.0929	0.0280785
ENSG00000136603	SKIL	-0.950954	0.0281183
ENSG00000171469	ZNF561	-0.628094	0.0282005
ENSG00000119862	LGALSL	-1.13133	0.0282918
ENSG00000113971	NPHP3	-1.03135	0.0283687
ENSG00000152332	UHMK1	-0.740703	0.0284803
ENSG00000105971	CAV2	-0.34979	0.0284883
ENSG00000155850	SLC26A2	-0.928649	0.0285724
ENSG00000165650	PDZD8	-0.85216	0.028623
ENSG00000119541	VPS4B	-0.377345	0.0289237
ENSG00000131149	GSE1	-1.01281	0.0289261
ENSG00000131697	NPHP4	-1.04744	0.0290407
ENSG00000165732	DDX21	-0.48821	0.0291058
ENSG00000117461	PIK3R3	-2.02954	0.0293362
ENSG00000083720	OXCT1	-0.444833	0.0295052
ENSG00000144909	OSBPL11	-1.0686	0.0295652
ENSG00000066455	GOLGA5	-0.367363	0.0296018
ENSG00000176390	CRLF3	-0.690018	0.029833
ENSG00000175582	RAB6A	-0.417208	0.0300376
ENSG00000087338	GMCL1	-0.791494	0.0300723
ENSG00000068366	ACSL4	-0.47028	0.0301102
ENSG00000270647	TAF15	-1.25925	0.0301606
ENSG00000137628	DDX60	-0.947958	0.0302563
ENSG00000058272	PPP1R12A	-0.3731	0.0303232
ENSG00000102038	SMARCA1	-0.402302	0.0303999
ENSG00000006576	PHTF2	-0.721701	0.0304409
ENSG00000147526	TACC1	-0.626184	0.0304835
ENSG00000149289	ZC3H12C	-2.6605	0.0308574
ENSG00000085719	CPNE3	-0.372029	0.0308653
ENSG00000067208	EVI5	-0.787998	0.0308836
ENSG00000164168	TMEM184C	-0.477013	0.0310038
ENSG00000108848	LUC7L3	-0.40961	0.0311774
ENSG00000115306	SPTBN1	-0.534622	0.0314098
ENSG00000137693	YAP1	-0.926095	0.0314386
ENSG00000142166	IFNAR1	-0.428859	0.031624
ENSG00000198874	TYW1	-0.600286	0.0317424
ENSG00000135870	RC3H1	-1.1301	0.0318112
ENSG00000153201	RANBP2	-0.683207	0.0318641
ENSG00000008405	CRY1	-0.611084	0.0319777
ENSG00000156931	VPS8	-0.674535	0.0320528
ENSG00000107890	ANKRD26	-0.721095	0.0320542
ENSG00000145743	FBXL17	-1.32583	0.0321084
ENSG00000121957	GPSM2	-0.59048	0.0321624
ENSG00000141279	NPEPPS	-0.482962	0.0321711
ENSG00000140575	IQGAP1	-0.511013	0.0322142
ENSG00000197375	SLC22A5	-1.1267	0.0322386
ENSG00000174574	AKIRIN1	-0.503547	0.0322512
ENSG00000108239	TBC1D12	-0.835467	0.0322748
ENSG00000085449	WDFY1	-0.579809	0.0322896
ENSG00000178105	DDX10	-0.666776	0.0323437
ENSG00000100697	DICER1	-1.10699	0.0323448
ENSG00000134352	IL6ST	-0.673891	0.0323842
ENSG00000138061	CYP1B1	-0.373433	0.0324396
ENSG00000121741	ZMYM2	-0.749073	0.0325354
ENSG00000197712	FAM114A1	-0.293277	0.0326121
ENSG00000254685	FPGT	-0.568087	0.0328063
ENSG00000170873	MTSS1	-1.21452	0.0330376
ENSG00000075407	ZNF37A	-0.972535	0.0330398
ENSG00000164332	UBLCP1	-0.522278	0.033061
ENSG00000163510	CWC22	-0.532342	0.0332763
ENSG00000124831	LRRFIP1	-0.334003	0.033281
ENSG00000187240	DYNC2H1	-0.746719	0.0333008
ENSG00000132356	PRKAA1	-0.534047	0.0337167
ENSG00000140598	EFL1	-0.681646	0.0337717
ENSG00000109929	SC5D	-0.542063	0.0337867
ENSG00000227398	KIF9-AS1	-1.1447	0.0338508
ENSG00000071537	SEL1L	-0.524349	0.034254
ENSG00000170017	ALCAM	-0.485595	0.0342999
ENSG00000103657	HERC1	-1.22031	0.0343083
ENSG00000004534	RBM6	-0.54473	0.0344519
ENSG00000180611	MB21D2	-0.803246	0.0345164
ENSG00000186340	THBS2	-0.615334	0.034526
ENSG00000236861	BET1-AS1	-1.54451	0.0345512
ENSG00000188215	DCUN1D3	-0.733363	0.034559
ENSG00000128585	MKLN1	-0.502167	0.0346101
ENSG00000131724	IL13RA1	-0.55844	0.0346247
ENSG00000101782	RIOK3	-0.459943	0.0346582
ENSG00000114480	GBE1	-0.345863	0.0347127
ENSG00000196712	NF1	-0.796646	0.034719
ENSG00000275052	PPP4R3B	-0.507571	0.0347374
ENSG00000170624	SGCD	-0.448946	0.0348973
ENSG00000117143	UAP1	-0.378682	0.0349825
ENSG00000151617	EDNRA	-0.550352	0.035213
ENSG00000106617	PRKAG2	-0.650885	0.0353082
ENSG00000196549	MME	-0.378711	0.0354763
ENSG00000165322	ARHGAP12	-0.508971	0.0355171
ENSG00000147162	OGT	-0.524644	0.0359105
ENSG00000139514	SLC7A1	-0.833969	0.0362017
ENSG00000282849		-2.07412	0.0362356
ENSG00000175073	VCPIP1	-0.740983	0.0363244
ENSG00000118496	FBXO30	-0.81166	0.0364424
ENSG00000136144	RCBTB1	-0.566492	0.0365041
ENSG00000117523	PRRC2C	-0.627792	0.0365554
ENSG00000159592	GPBP1L1	-0.517537	0.0366642
ENSG00000175595	ERCC4	-0.999116	0.0367556
ENSG00000183826	BTBD9	-1.47557	0.0368918
ENSG00000123575	FAM199X	-0.979073	0.0369884
ENSG00000198046	ZNF667	-1.10515	0.0370711
ENSG00000135069	PSAT1	-0.282065	0.03723
ENSG00000152291	TGOLN2	-0.403726	0.0376893
ENSG00000134265	NAPG	-0.504586	0.0377487
ENSG00000139291	TMEM19	-0.716023	0.0377541
ENSG00000115760	BIRC6	-0.733293	0.0377867
ENSG00000171634	BPTF	-0.929313	0.0378598
ENSG00000119953	SMNDC1	-0.685961	0.0379844
ENSG00000107758	PPP3CB	-0.743936	0.0380034
ENSG00000165355	FBXO33	-0.816543	0.0380325
ENSG00000173542	MOB1B	-1.14913	0.0380584
ENSG00000149089	APIP	-0.561015	0.038065
ENSG00000113742	CPEB4	-1.29776	0.0380961
ENSG00000205808	PLPP6	-0.885027	0.0381217
ENSG00000100523	DDHD1	-0.553885	0.038202
ENSG00000198406	BZW1P2	-0.877429	0.0382421
ENSG00000062725	APPBP2	-0.523732	0.0384878
ENSG00000138095	LRPPRC	-0.442315	0.0385215
ENSG00000134294	SLC38A2	-0.414643	0.0385892
ENSG00000101596	SMCHD1	-1.00419	0.0388711
ENSG00000196367	TRRAP	-0.994056	0.0395137
ENSG00000006451	RALA	-0.351869	0.0397062
ENSG00000198839	ZNF277	-0.655428	0.0398172
ENSG00000154175	ABI3BP	-0.429536	0.0398264
ENSG00000185619	PCGF3	-0.619476	0.0398385
ENSG00000006125	AP2B1	-0.323637	0.0398464
ENSG00000172765	TMCC1	-0.850838	0.0398661
ENSG00000135945	REV1	-0.611989	0.0399303
ENSG00000070961	ATP2B1	-0.445394	0.0399757
ENSG00000147853	AK3	-0.379743	0.0400626
ENSG00000101868	POLA1	-0.947717	0.040094
ENSG00000091844	RGS17	-1.01702	0.0401646
ENSG00000067048	DDX3Y	-0.569671	0.0402499
ENSG00000106049	HIBADH	-0.310035	0.0405398
ENSG00000083099	LYRM2	-0.484603	0.040655
ENSG00000111897	SERINC1	-0.357163	0.0408078
ENSG00000151422	FER	-0.747991	0.0410108
ENSG00000188342	GTF2F2	-0.497732	0.0410507
ENSG00000065833	ME1	-0.424088	0.0410773
ENSG00000177683	THAP5	-0.835239	0.0410776
ENSG00000173848	NET1	-0.953816	0.041148
ENSG00000125386	FAM193A	-1.10221	0.0413171
ENSG00000134480	CCNH	-0.423647	0.0413859
ENSG00000049167	ERCC8	-0.550051	0.0413905
ENSG00000171843	MLLT3	-0.906783	0.041491
ENSG00000089177	KIF16B	-0.740702	0.0416804
ENSG00000113658	SMAD5	-0.454354	0.0416823
ENSG00000100941	PNN	-0.635784	0.0418135
ENSG00000142973	CYP4B1	-1.19098	0.0421205
ENSG00000100201	DDX17	-0.611824	0.0422565
ENSG00000186088	GSAP	-1.16709	0.0422655
ENSG00000162929	SANBR	-0.995228	0.0425671
ENSG00000100345	MYH9	-0.411335	0.0426078
ENSG00000186522	SEPTIN10	-0.398227	0.0426089
ENSG00000090686	USP48	-0.492287	0.04262
ENSG00000083937	CHMP2B	-0.336624	0.0426561
ENSG00000115970	THADA	-0.8057	0.042688
ENSG00000116977	LGALS8	-0.439034	0.0428863
ENSG00000166025	AMOTL1	-0.600007	0.0430277
ENSG00000164609	SLU7	-0.396952	0.0431628
ENSG00000137492	THAP12	-0.508016	0.0433382
ENSG00000117155	SSX2IP	-0.875281	0.0435213
ENSG00000197170	PSMD12	-0.314254	0.0436985
ENSG00000241399	CD302	-0.715041	0.0436993
ENSG00000112419	PHACTR2	-0.600717	0.0437197
ENSG00000144668	ITGA9	-2.7799	0.0437457
ENSG00000106080	FKBP14	-0.440499	0.0437591
ENSG00000170633	RNF34	-0.423643	0.0437762
ENSG00000223960	CHROMR	-0.932196	0.0440636
ENSG00000162434	JAK1	-0.305529	0.04418
ENSG00000141646	SMAD4	-0.536843	0.0443515
ENSG00000173068	BNC2	-0.549363	0.044672
ENSG00000177879	AP3S1	-0.366934	0.0447169
ENSG00000065150	IPO5	-0.390426	0.0449507
ENSG00000186866	POFUT2	-0.522388	0.0449959
ENSG00000145012	LPP	-0.617728	0.0454919
ENSG00000050405	LIMA1	-0.295761	0.0456355
ENSG00000144724	PTPRG	-0.551272	0.0457418
ENSG00000186298	PPP1CC	-0.386604	0.0457815
ENSG00000101773	RBBP8	-0.624362	0.0458136
ENSG00000005020	SKAP2	-0.388815	0.045993
ENSG00000152818	UTRN	-0.731281	0.0459985
ENSG00000285517	LINC00941	-1.11044	0.0462413
ENSG00000118260	CREB1	-0.568827	0.0464652
ENSG00000111799	COL12A1	-0.980801	0.0465596
ENSG00000175198	PCCA	-0.5303	0.046591
ENSG00000118200	CAMSAP2	-0.854558	0.0466893
ENSG00000163359	COL6A3	-0.355092	0.0467914
ENSG00000070950	RAD18	-0.624119	0.0468846
ENSG00000181751	MACIR	-0.421276	0.0469237
ENSG00000041982	TNC	-0.529213	0.046963
ENSG00000117222	RBBP5	-0.742414	0.0470328
ENSG00000079308	TNS1	-0.425101	0.0472122
ENSG00000205268	PDE7A	-1.13173	0.0472852
ENSG00000075151	EIF4G3	-0.512263	0.0474487
ENSG00000102401	ARMCX3	-0.386583	0.0474997
ENSG00000144366	GULP1	-0.686201	0.0476189
ENSG00000112234	FBXL4	-0.6501	0.0476349
ENSG00000197323	TRIM33	-0.631437	0.0477762
ENSG00000101972	STAG2	-0.550899	0.0478711
ENSG00000134318	ROCK2	-0.455843	0.0479356
ENSG00000198964	SGMS1	-0.591101	0.0479725
ENSG00000126070	AGO3	-0.991718	0.0480972
ENSG00000104064	GABPB1	-0.568634	0.0481446
ENSG00000166887	VPS39	-0.433704	0.0481931
ENSG00000198252	STYX	-0.559959	0.0482242
ENSG00000139687	RB1	-0.548134	0.0483256
ENSG00000115392	FANCL	-0.555173	0.0486354
ENSG00000111817	DSE	-0.489647	0.0487339
ENSG00000101544	ADNP2	-0.907822	0.0488747
ENSG00000083312	TNPO1	-0.504506	0.0489131
ENSG00000165124	SVEP1	-0.680038	0.0489904
ENSG00000085365	SCAMP1	-0.451256	0.0489923
ENSG00000120063	GNA13	-0.543014	0.049144
ENSG00000176018	LYSMD3	-0.615916	0.0492577
ENSG00000138078	PREPL	-0.430734	0.0492756
ENSG00000125814	NAPB	-1.07459	0.0493197
ENSG00000138430	OLA1	-0.34889	0.0493587
ENSG00000198363	ASPH	-0.267261	0.0493851
ENSG00000163879	DNALI1	-0.758729	0.0495017
ENSG00000170776	AKAP13	-0.577998	0.0495145
ENSG00000066651	TRMT11	-0.56186	0.0497052
ENSG00000106692	FKTN	-0.757768	0.0497603
ENSG00000164741	DLC1	-0.452431	0.0499105
ENSG00000112851	ERBIN	-0.798413	0.0499387
ENSG00000122741	DCAF10	-0.495265	0.0499985
Supp. Table 3. Complete list of DEG significantly downregulated genes (p-value <0.05) on the model of intramuscular adipose tissue subjected to space exposome exposure (n=3) compared to the ground control (n=3) in logFC.
Non-protein-coding DEG are highlight in italic.* = FDR < 0.05.
